# Supplementary material for: Molecular changes among non-volatile disinfection by-products between drinking water treatment and consumer taps
Source: Royal Society of Chemistry journal article supplement (doi:10.1039/d1ew00389e), 2021-01-01
Supplement: d1ew00389e1.pdf [file d1ew00389e1.pdf]

## Electronic Supplementary Information

# Molecular changes among non-volatile disinfection by-products between drinking water treatment and consumer taps

Anna Andersson<sup>a\*</sup>, Michael Gonsior<sup>b</sup>, Mourad Harir<sup>c,d</sup>, Norbert Hertkorn<sup>c</sup>, Philippe Schmitt-Kopplin<sup>c,d</sup>, Leanne Powers<sup>b</sup>, Henrik Kylin<sup>a,e</sup>, Daniel Hellström<sup>f</sup>, Kerstin Nilsson<sup>g</sup>, Ämma Pettersson<sup>h</sup>, Helena Stavklint<sup>i</sup> and David Bastviken<sup>a</sup>

<sup>a</sup> Department of Thematic Studies – Environmental Change, Linköping University, SE-581 83 Linköping, Sweden

<sup>b</sup> University of Maryland Center for Environmental Science, Chesapeake Biological Laboratory, Solomons, Maryland 20688, USA

<sup>c</sup> Research Unit Analytical BioGeoChemistry, Helmholtz Zentrum München, German Research Center for Health and Environment, Ingolstaedter Landstraße 1, 85764 Neuherberg, Germany

<sup>d</sup> Chair of Analytical Food Chemistry, Technische Universität München, 85354 Freising, Germany

<sup>e</sup> Research Unit: Environmental Sciences and Management, North-West University, Potchefstroom, South Africa

<sup>f</sup> Norrvatten, Kvalitet och Utveckling, SE-169 02 Solna, Sweden

<sup>g</sup> VA SYD, Rännemästaregatan 3, SE-212 23 Malmö, Sweden

<sup>h</sup> Nodra, Borgs vattenverk, SE-603 36 Norrköping, Sweden

<sup>i</sup> Tekniska verken i Linköping AB (publ), SE-581 15 Linköping, Sweden

\*Corresponding author: [anna.e.andersson@liu.se](mailto:anna.e.andersson@liu.se)

LIN      Mar ■      May ■      Aug ■      Nov ■      Jan ■

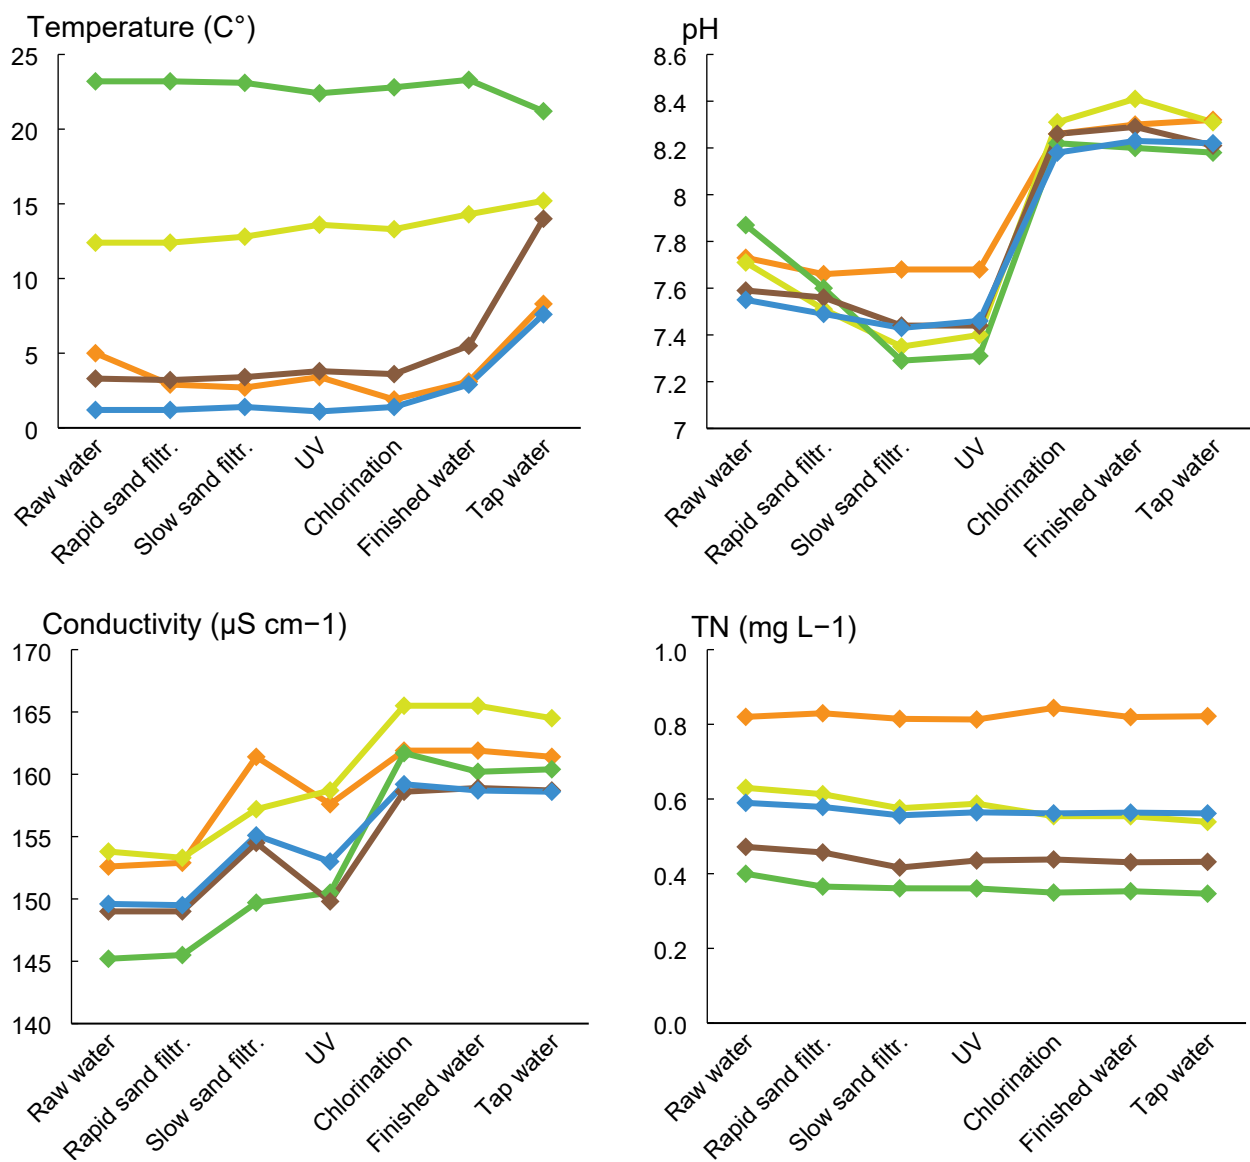

Figure S1. Changes in temperature, pH, conductivity, and total nitrogen (TN) upon treatment at LIN.

# NOR

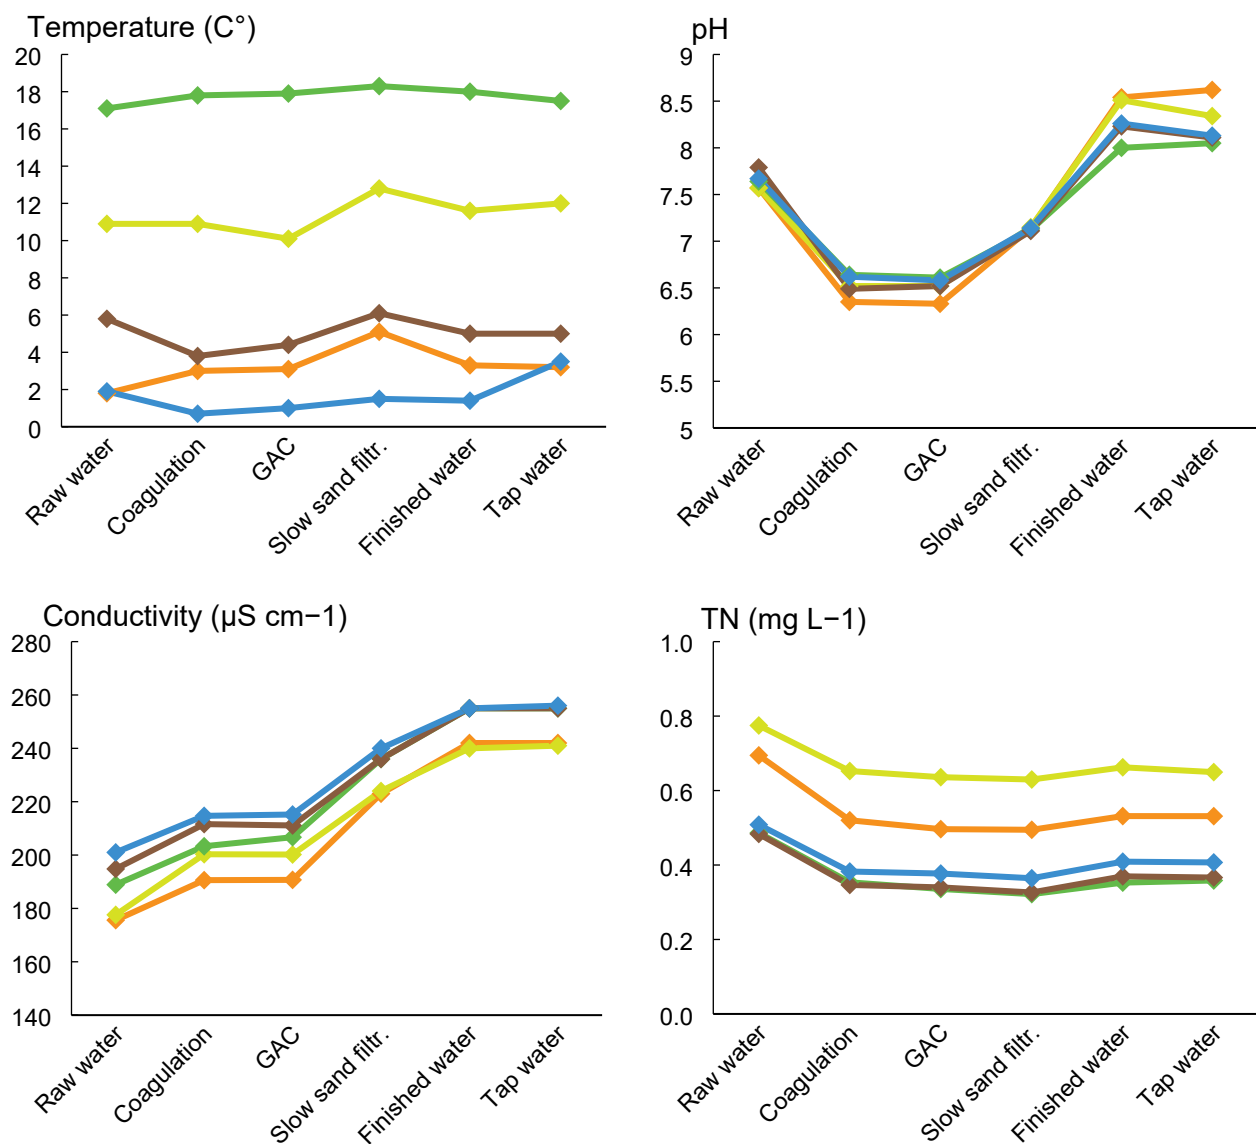

**Figure S2.** Changes in temperature, pH, conductivity, and total nitrogen (TN) upon treatment at NOR.

# STO

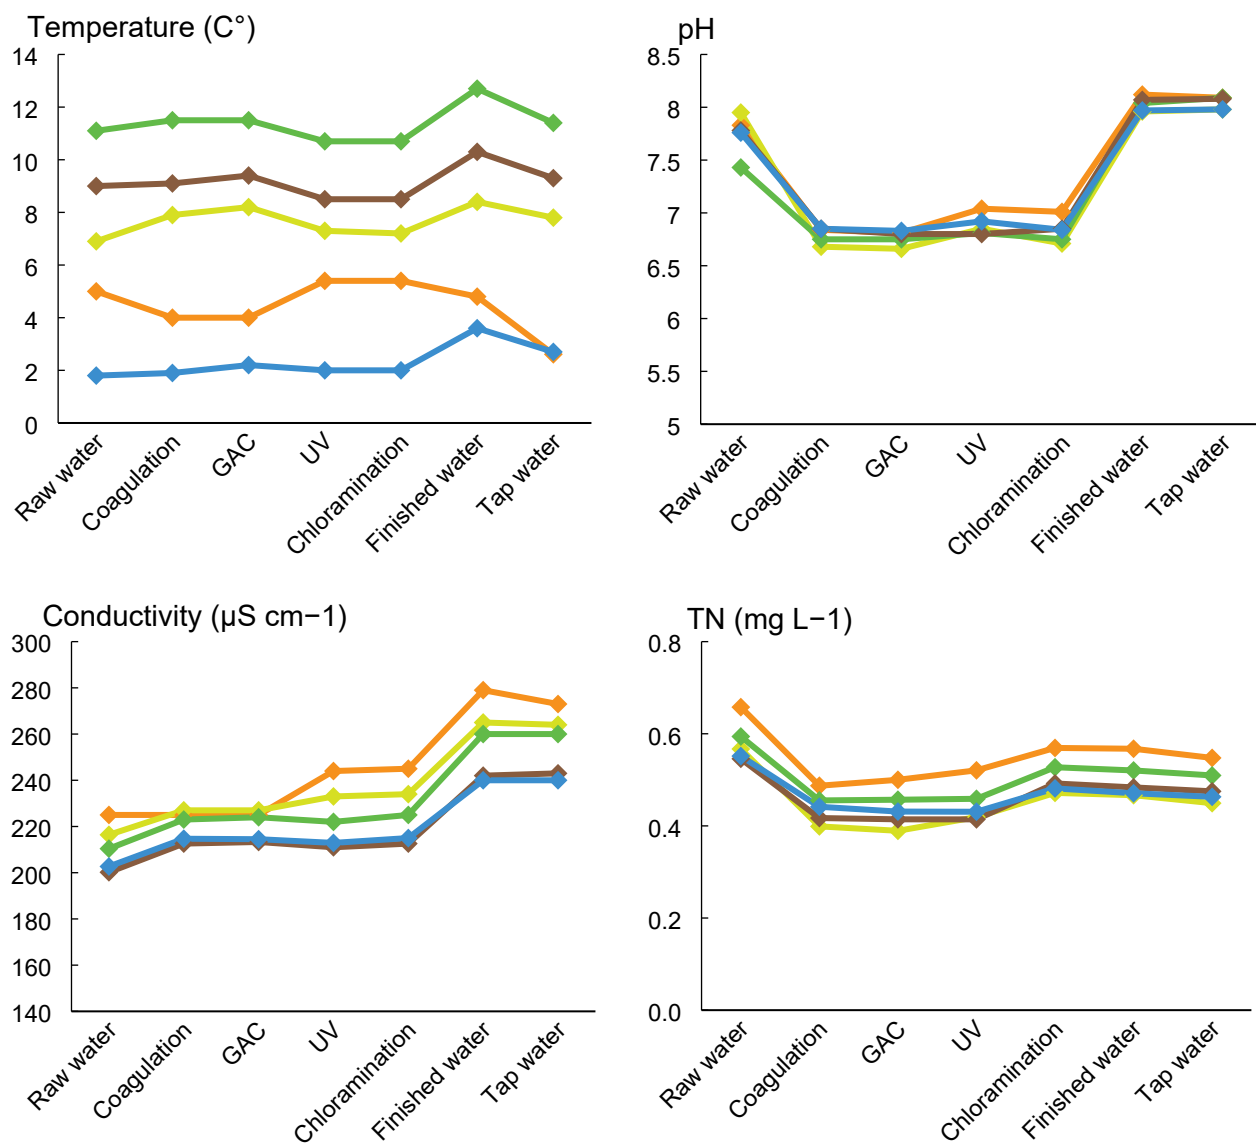

**Figure S3.** Changes in temperature, pH, conductivity, and total nitrogen (TN) upon treatment at STO.

# MAL

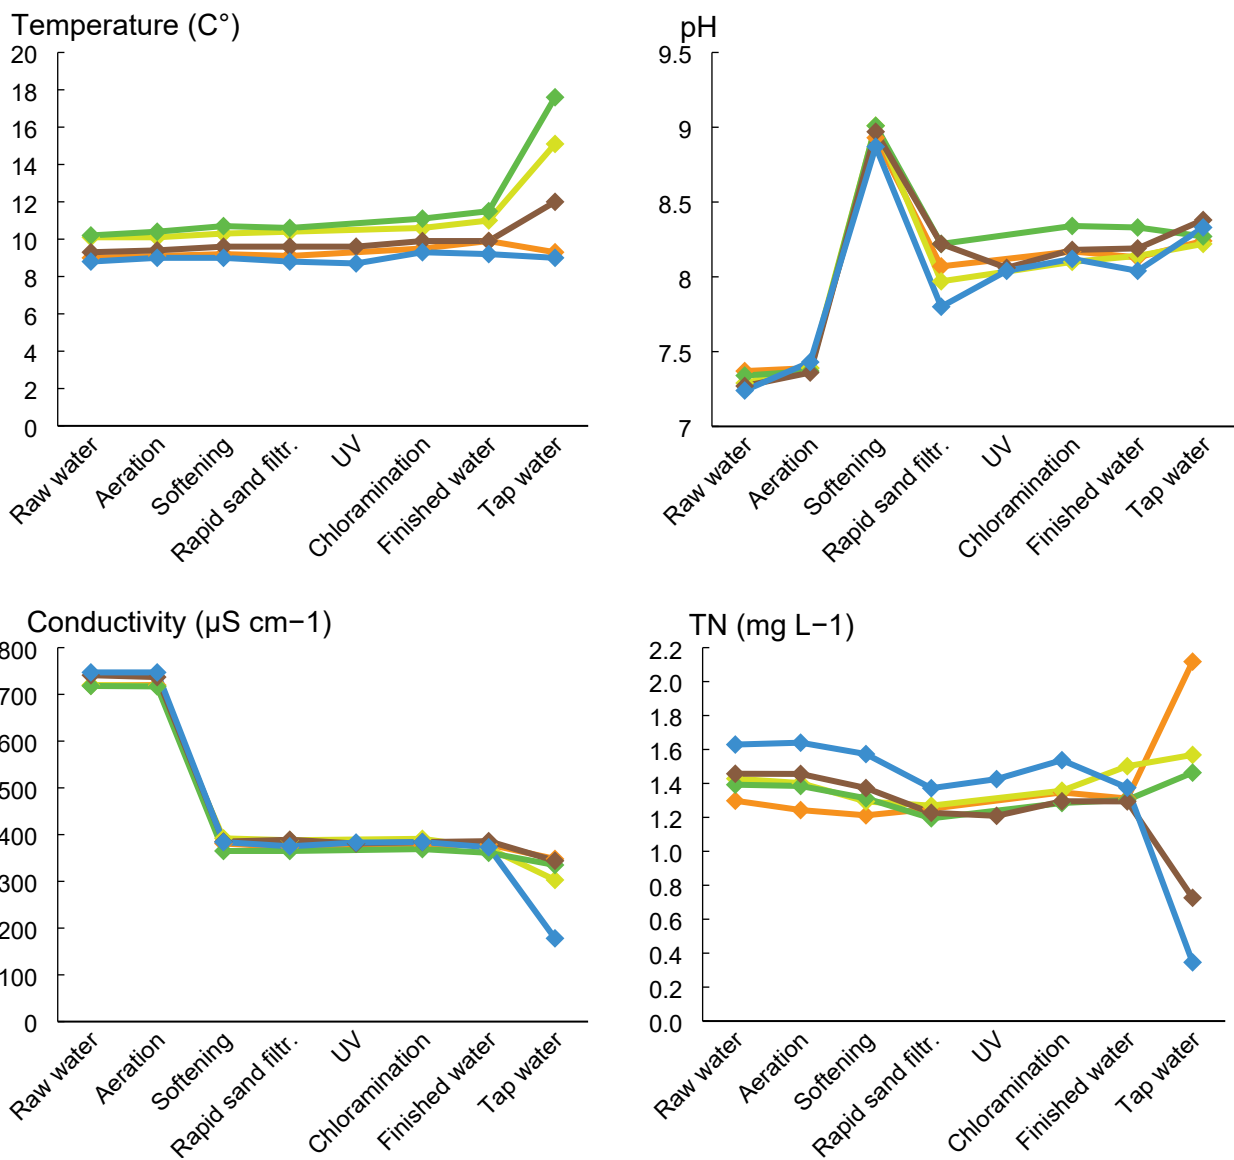

**Figure S4.** Changes in temperature, pH, conductivity, and total nitrogen (TN) upon treatment at MAL. UV was installed during the sample campaign, why data at this sampling point are available for two occasions only.

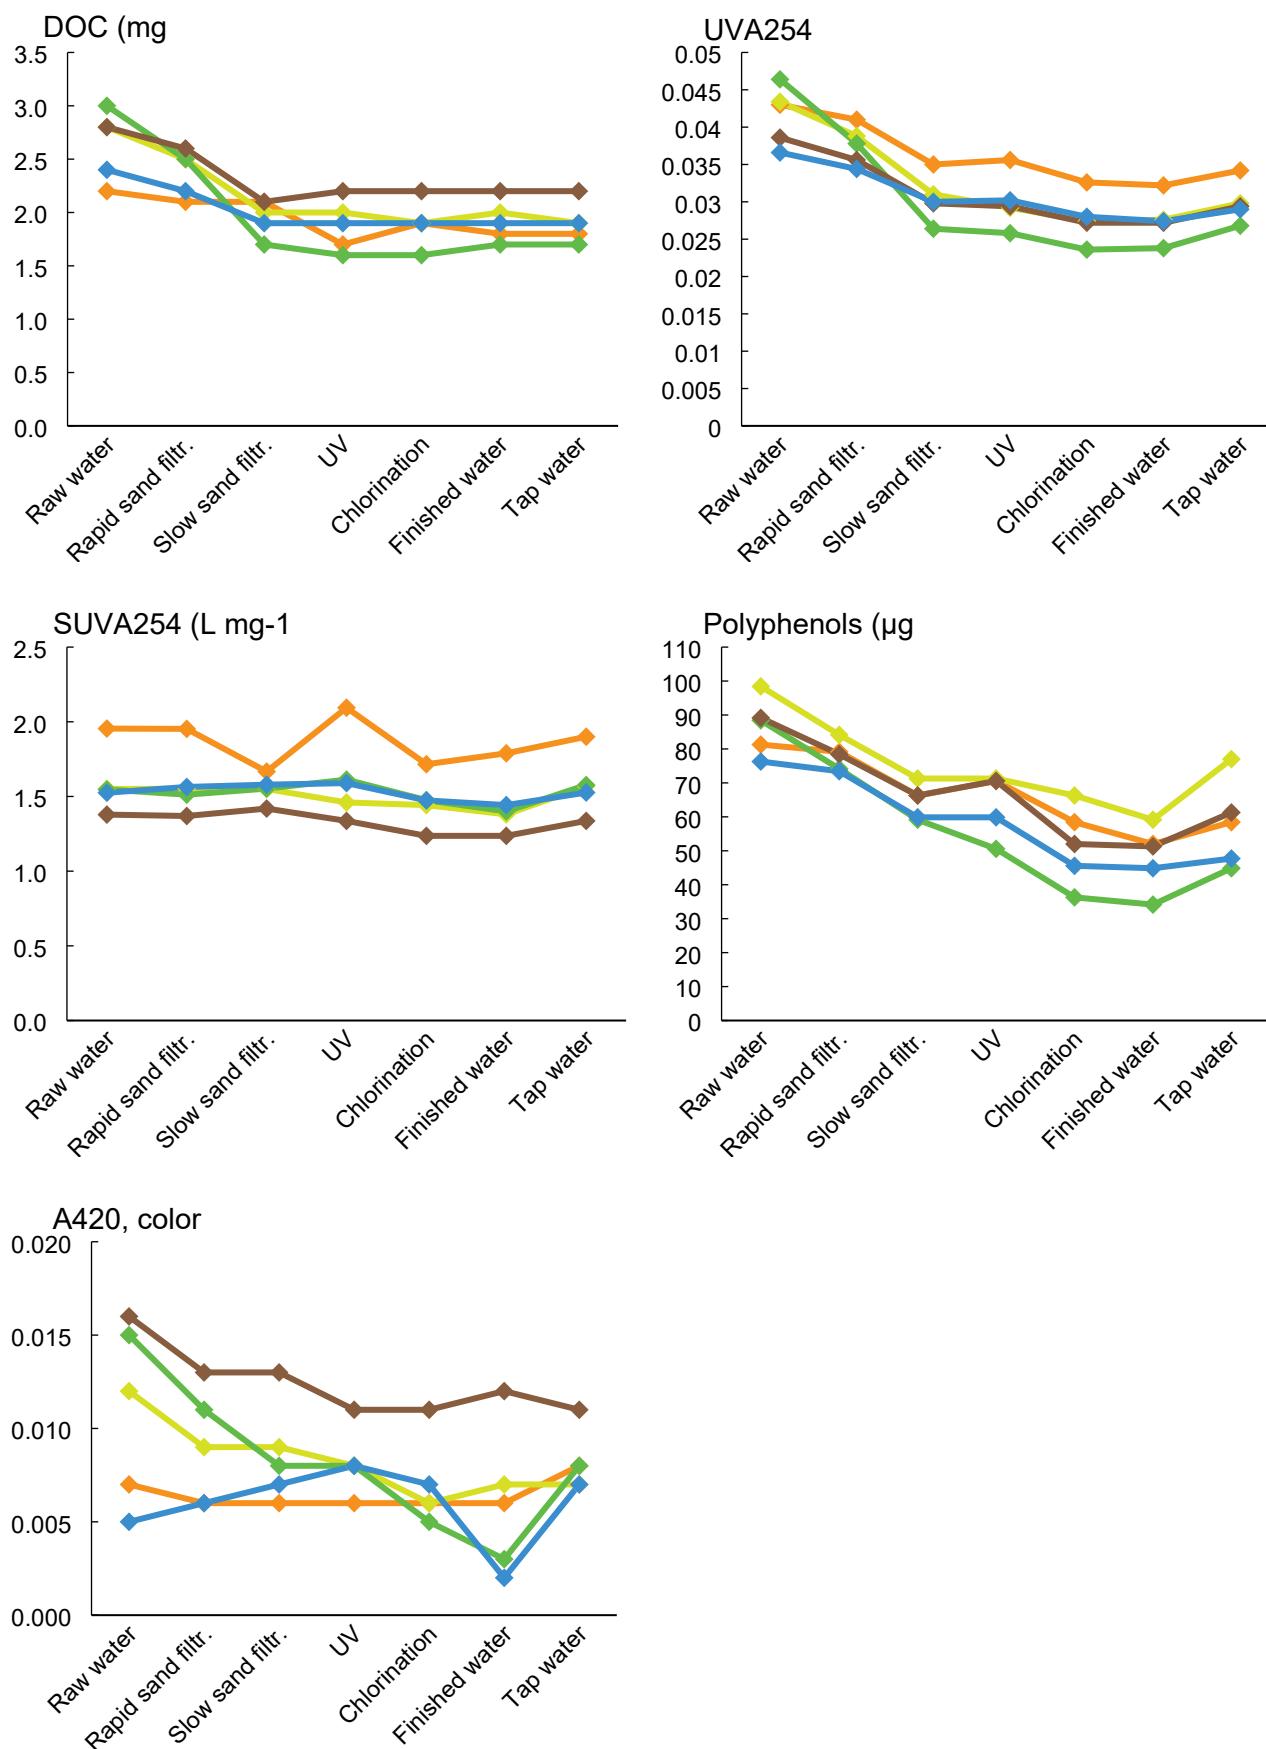

Figure S5. Changes in DOC, UVA<sub>254</sub>, SUVA<sub>254</sub>, polyphenols and A<sub>420</sub> upon treatment at LIN.

# NOR

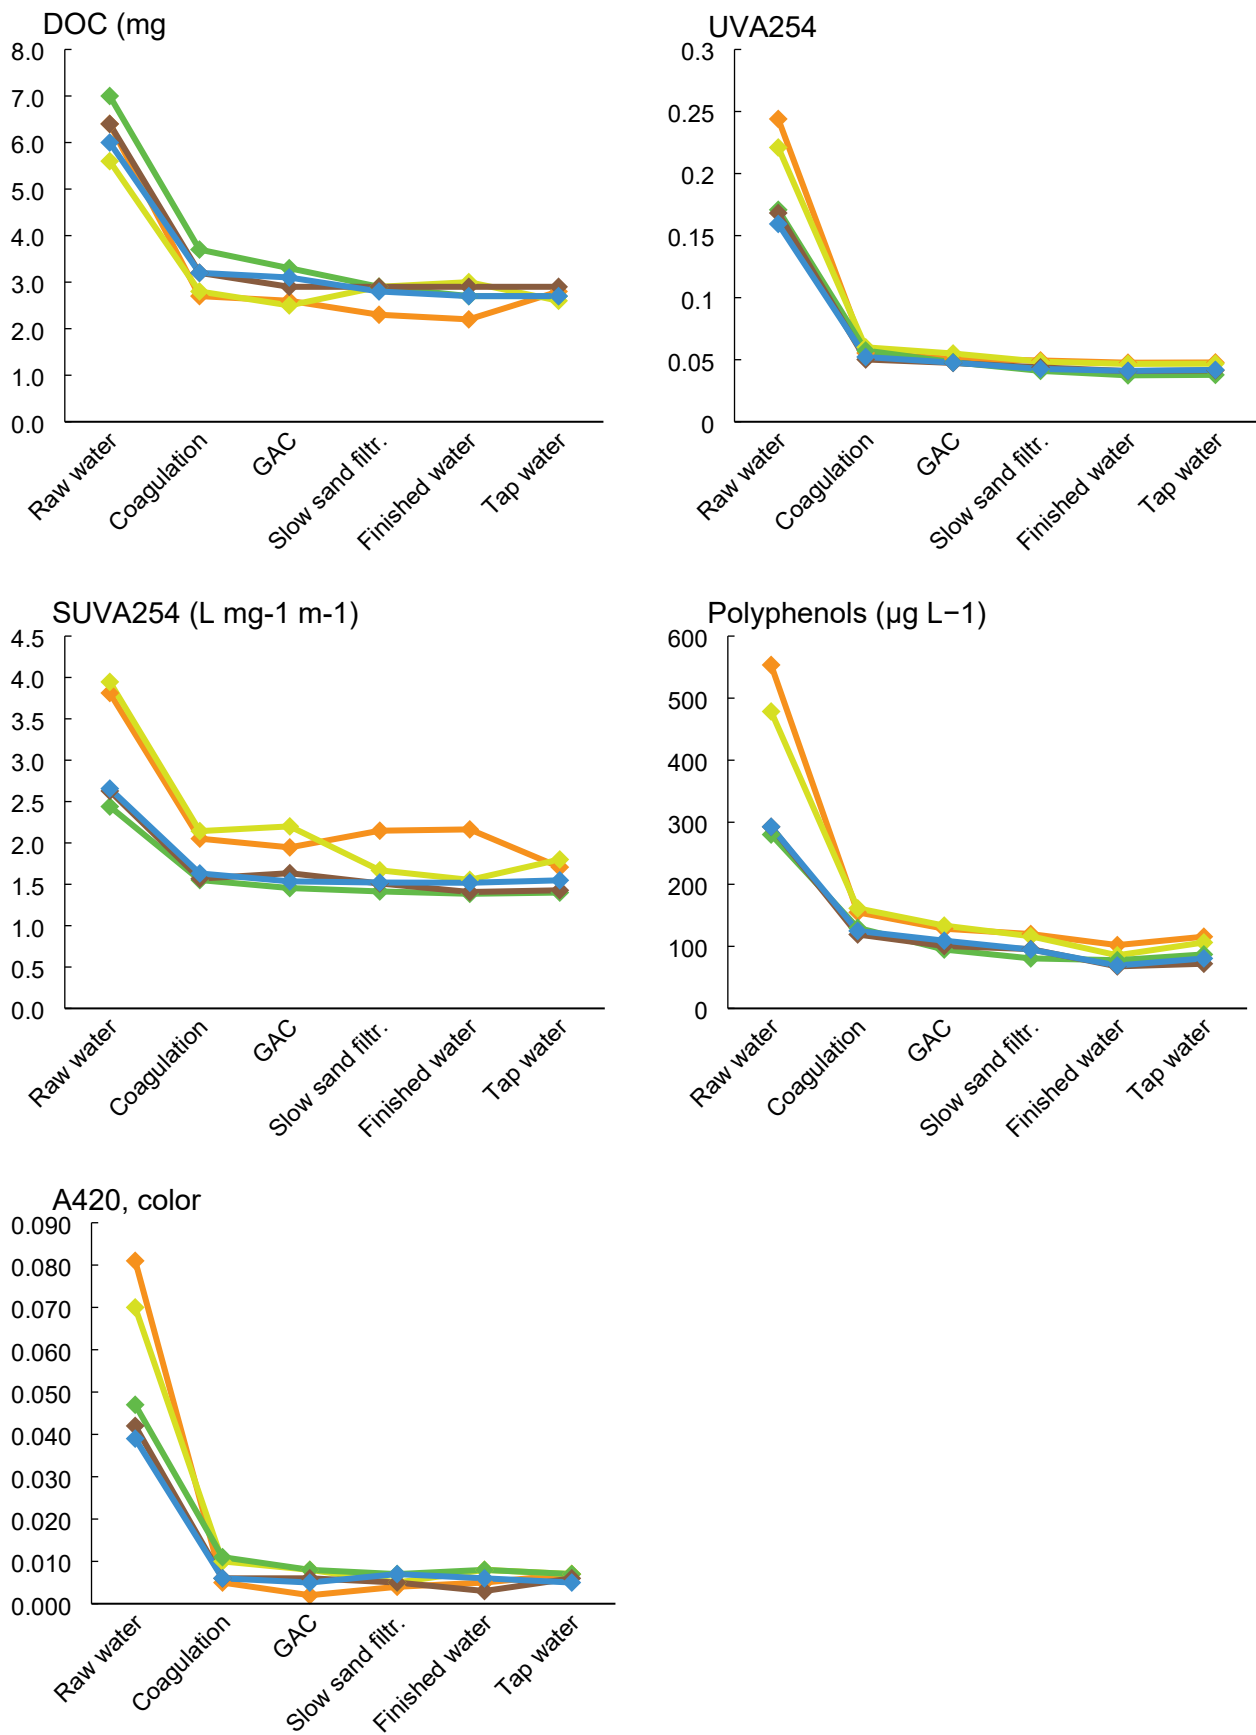

**Figure S6.** Changes in DOC, UVA<sub>254</sub>, SUVA<sub>254</sub>, polyphenols and A<sub>420</sub> upon treatment at NOR.

# STO

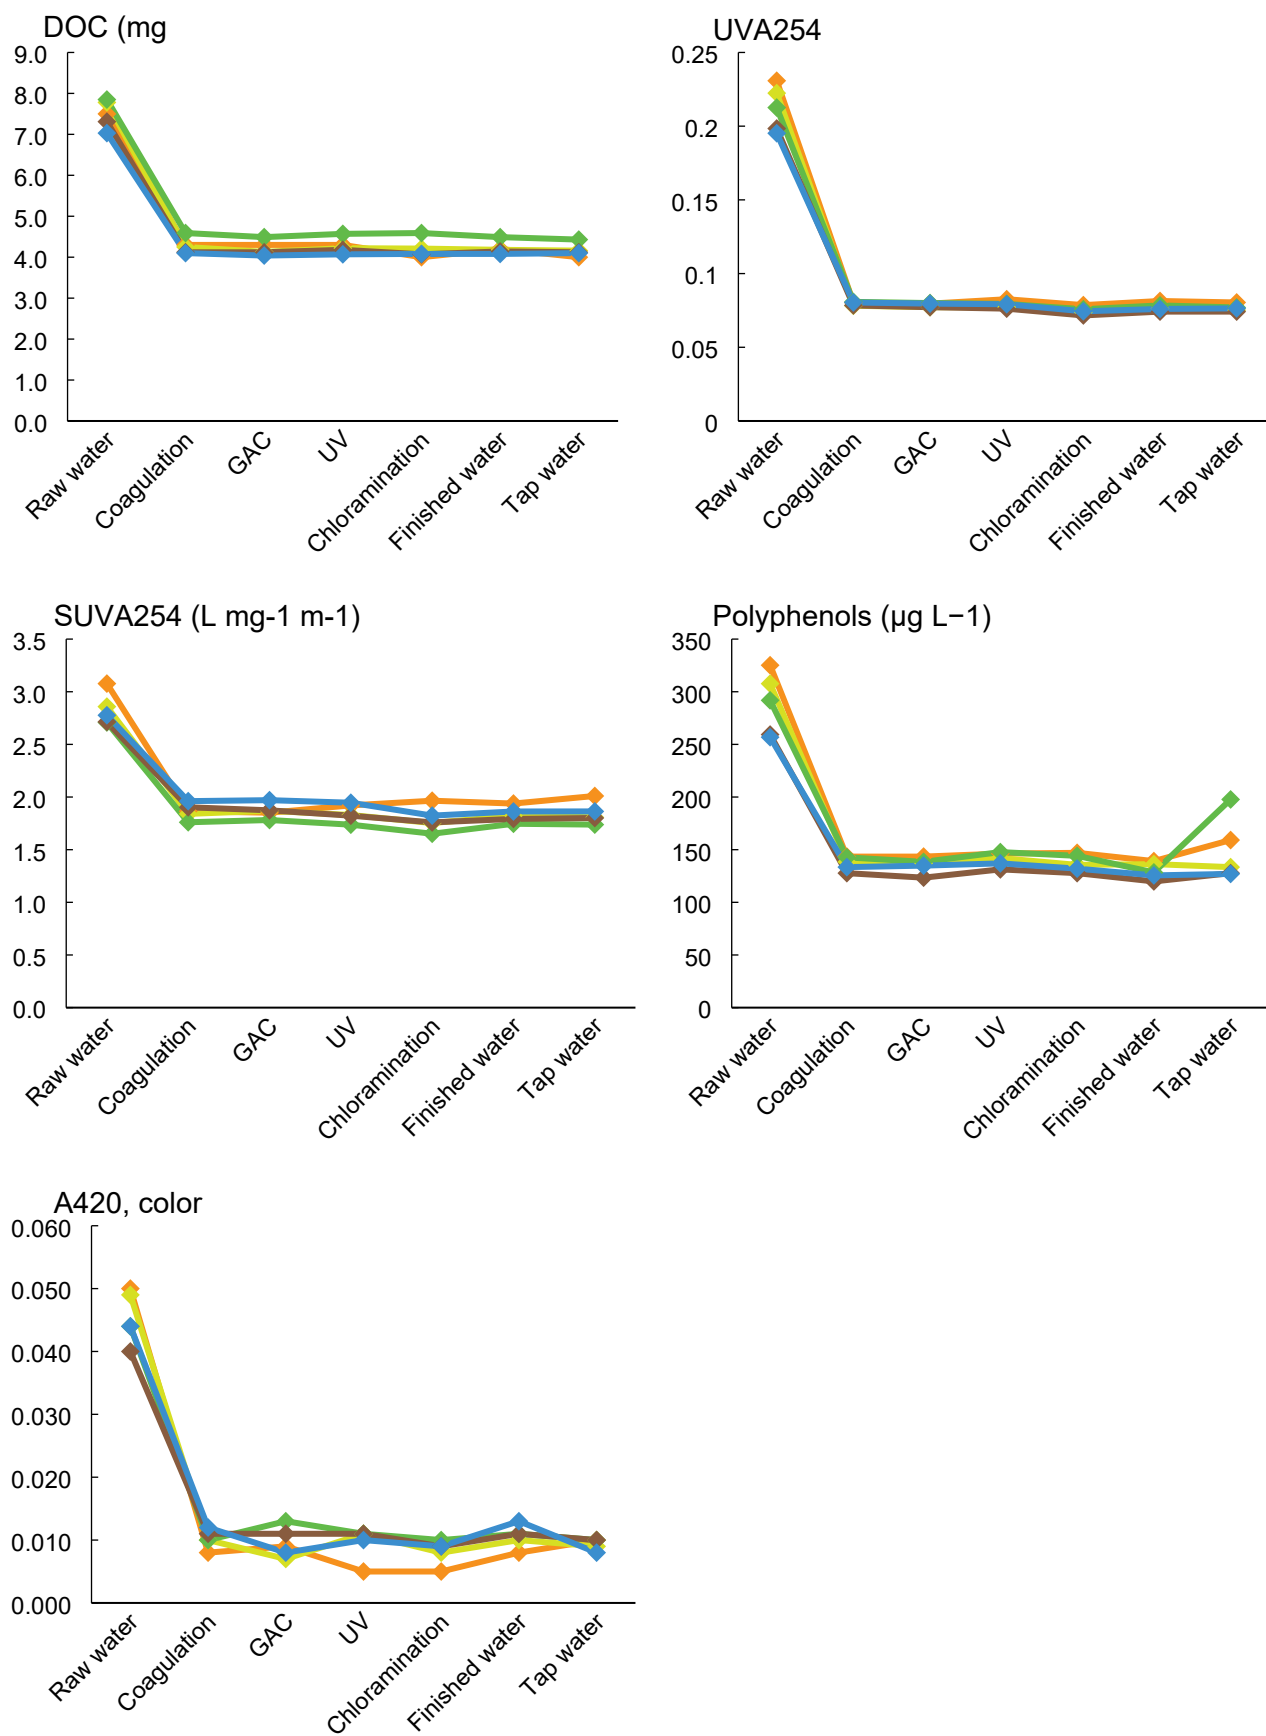

**Figure S7.** Changes in DOC, UVA<sub>254</sub>, SUVA<sub>254</sub>, polyphenols and A<sub>420</sub> upon treatment at STO.



# MAL

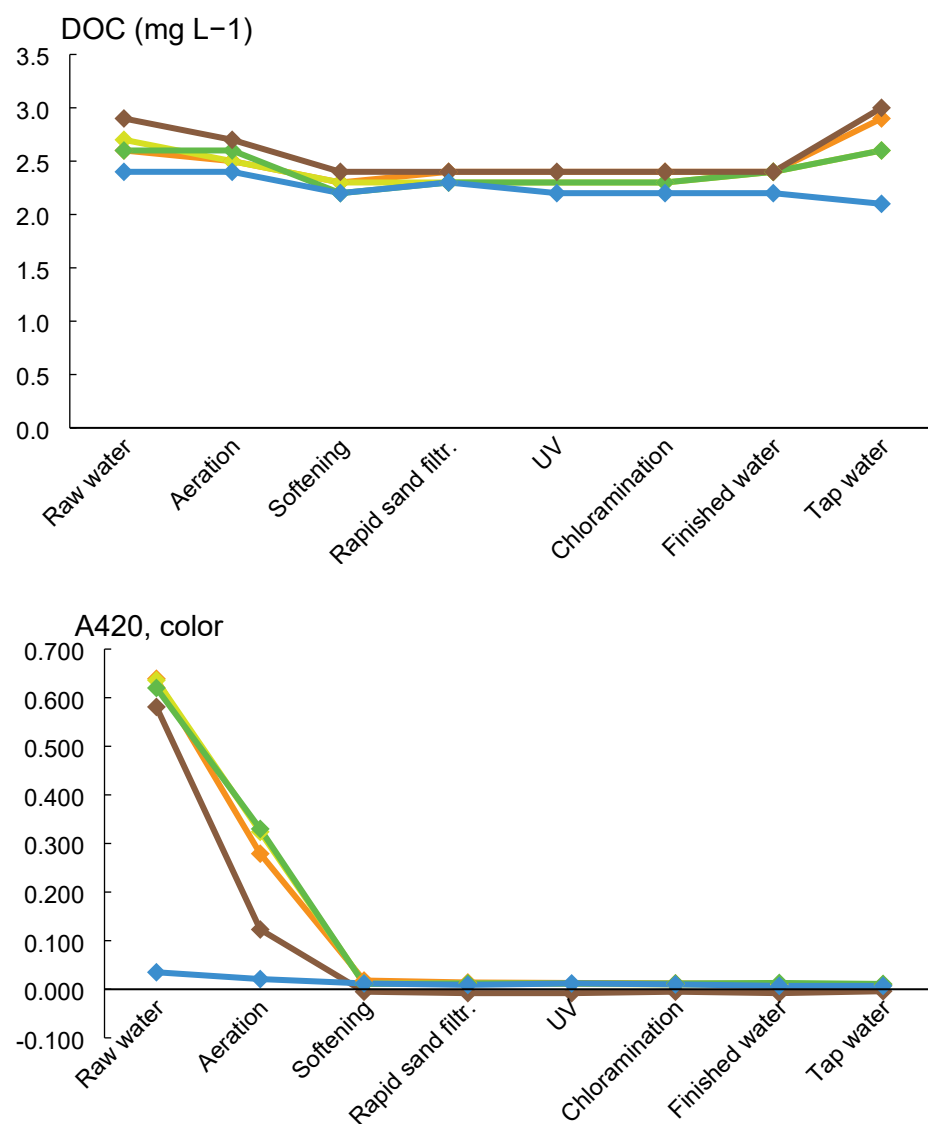

**Figure S8.** Changes in DOC and A<sub>420</sub> upon treatment at MAL. Data for UVA<sub>254</sub>, SUVA<sub>254</sub>, and polyphenols are not shown due to interferences of iron on absorbance measurements for DOM analysis at this water source. UV was installed during the sample campaign, why data at this sampling point only are available for two occasions.

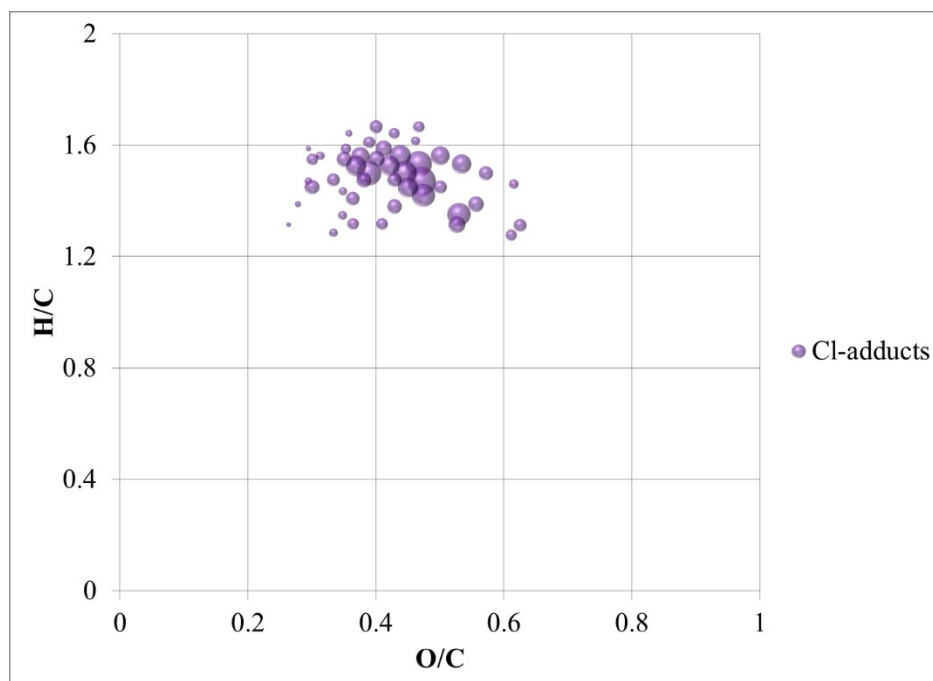

**Figure S9.** Van Krevelen diagram showing chlorine adducts consistently formed when Bond Elut PPL cartridges were washed with HCl water prior to elution. These data are from previous work, including sampling at multiple lakes and streams in Sweden, and motivates the choice of washing solvent (0.1% formic acid water) in this study.

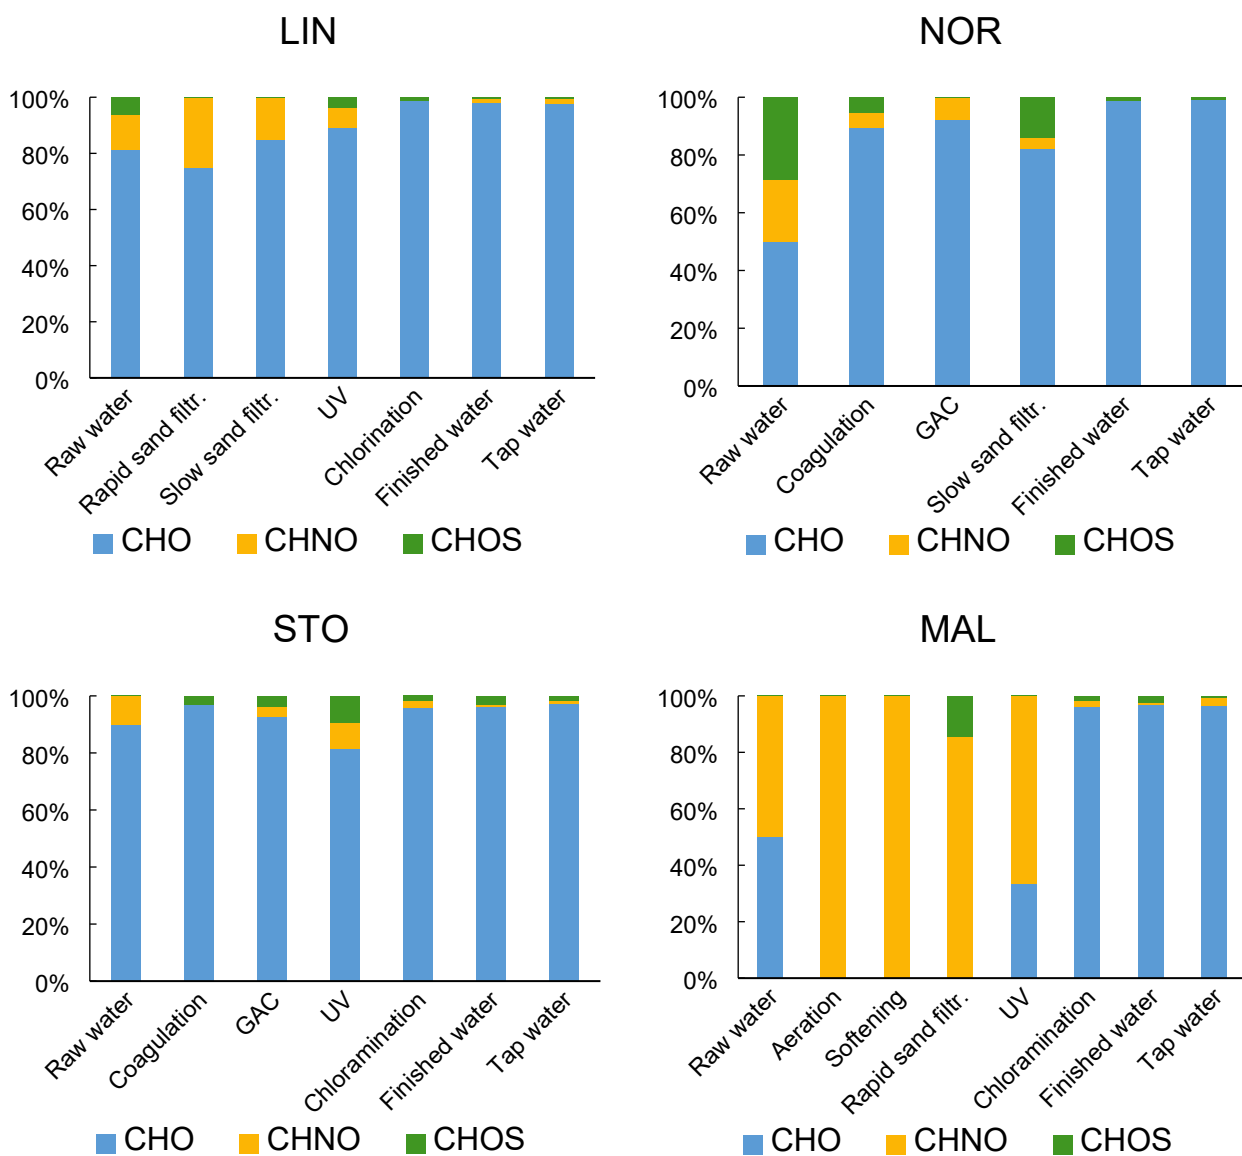

**Figure S10.** Relative contribution of CHO-, CHNO- and CHOS-type halogenated DOM molecular compositions detected throughout the treatment processes at LIN, NOR, STO and MAL (data from all five sampling occasions combined).

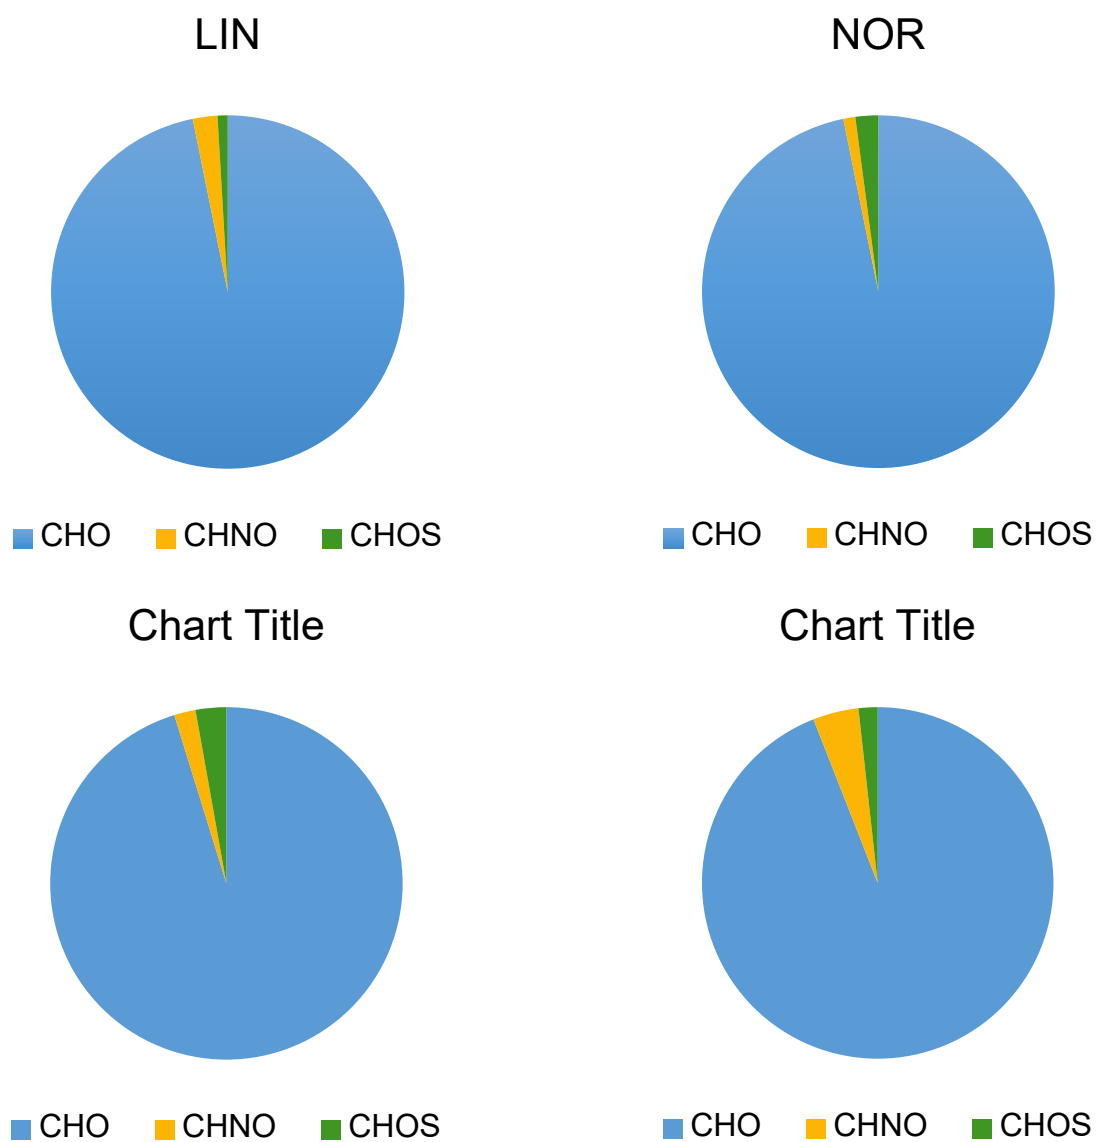

**Figure S11.** Overall distribution of the DOM molecular series, CHO, CHNO and CHOS of the chlorine- and bromine-containing DOM formulae including all sampling points (source water to tap) and consolidated formulae from all five sampling occasions.

■ CHO   
 ■ CHNO   
 ■ CHOS   
 ■ CHNOS

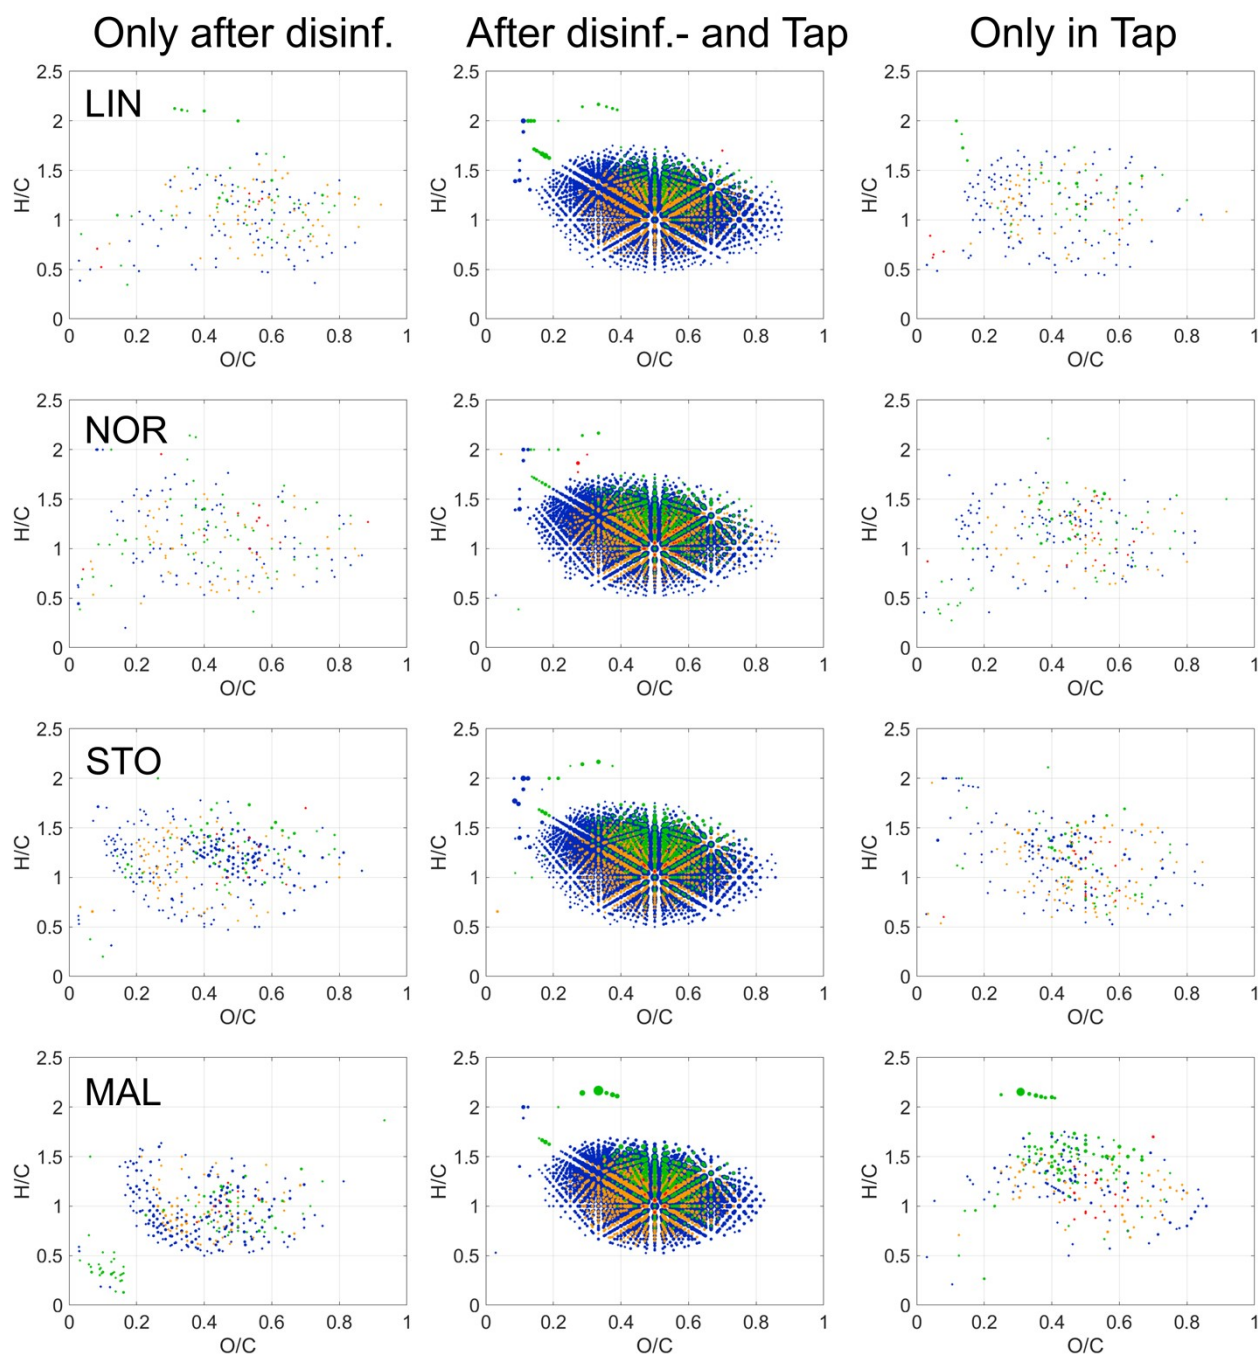

**Figure S12.** Van Krevelen plots for DOM molecular formulae detected only after chemical disinfection (left panel), at disinfection and in tap waters (middle panel) and in the tap waters only (right panel) at the four DWTPs (DBPs formed throughout the five sampling events combined). Note that Tap water at MAL is a mix of water from three DWTPs and therefore not directly comparable to the MAL DWTP water.

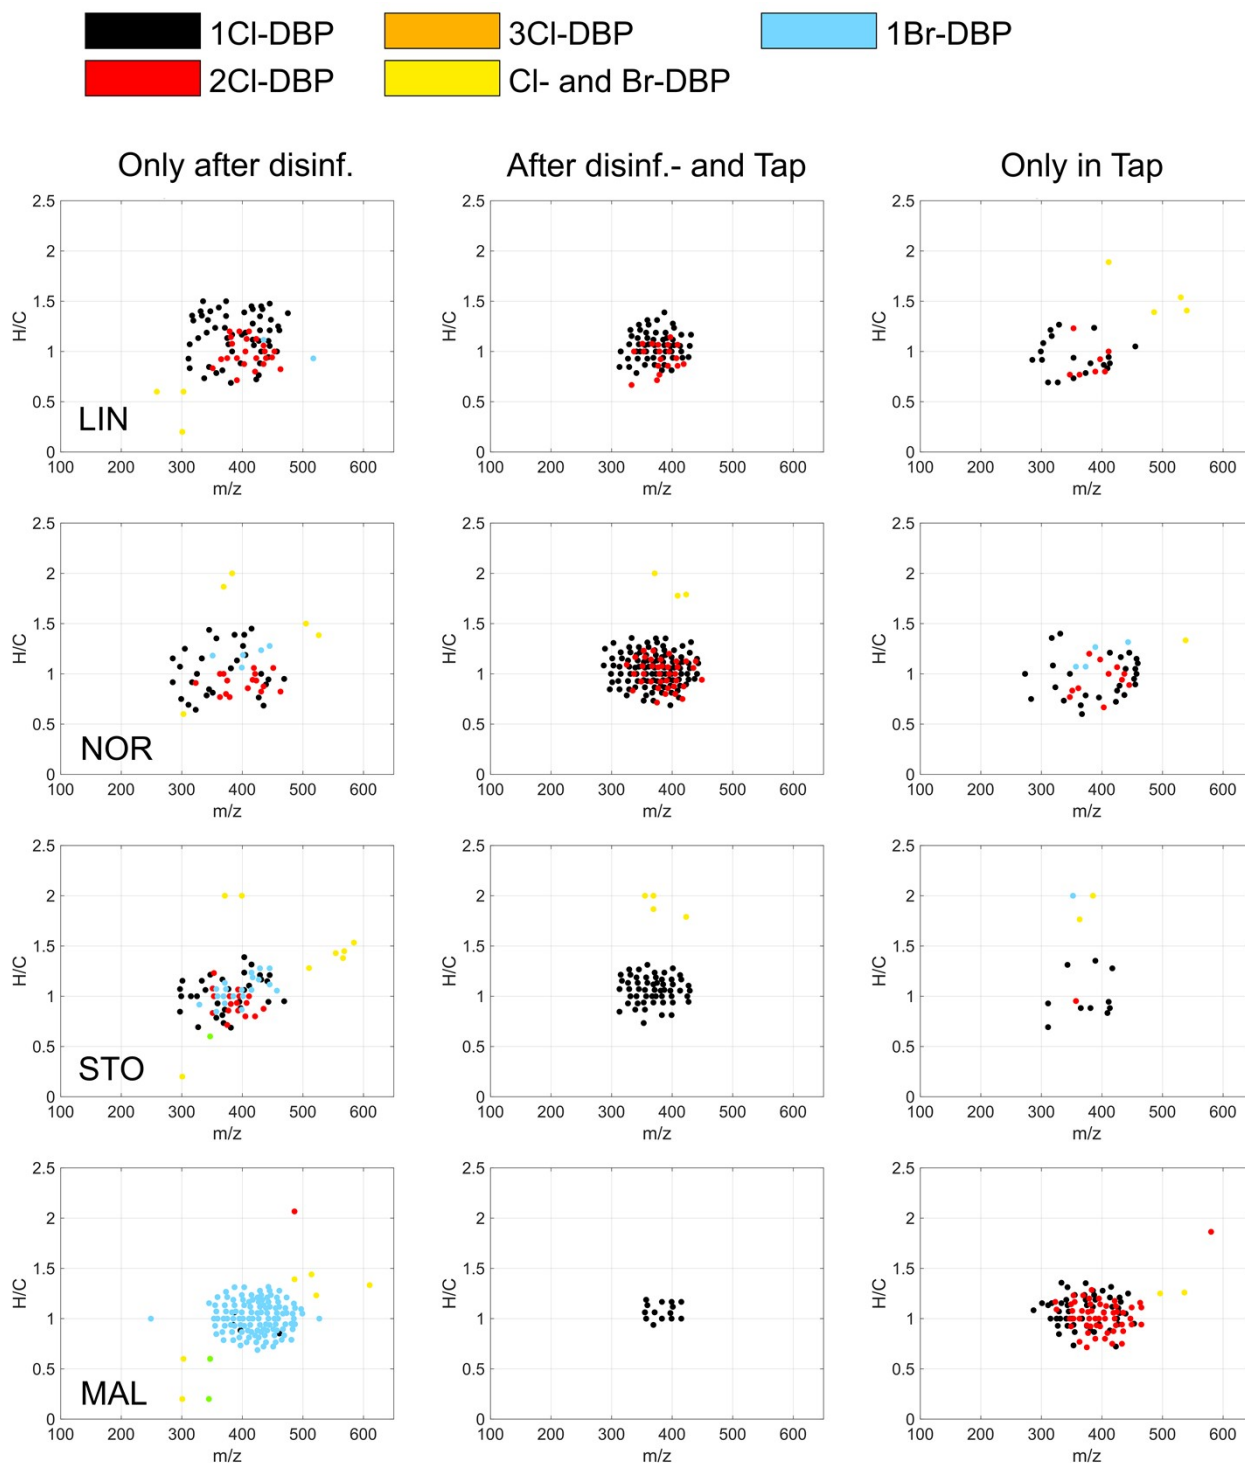

**Figure S13.** Edited H/C to mass plots for the verified DBPs detected after chemical disinfection only (left panel), at chemical disinfection and in tap waters (middle panel) and in the tap waters only (right panel) at the four DWTPs (DBPs formed throughout the five sampling events combined). Note that Tap water at MAL is a mix of water from three DWTPs and therefore not directly comparable to the MAL DWTP water.

**Table S1.** Raw water characteristics in LIN, NOR, STO and MAL. The average concentration of two replicates is reported for total nitrogen (TN), with standard deviation <0.01 mg L<sup>-1</sup> (LIN, NOR, STO) and <0.03 mg L<sup>-1</sup> (MAL). NR = Not reported.

| <i>DWTP</i> | <i>Month</i> | <i>Temp</i> | <i>pH</i> | <i>Cond.</i>           | <i>TN</i>          | <i>DOC</i>         | <i>UVA<sub>254</sub></i> | <i>SUVA</i>                           |
|-------------|--------------|-------------|-----------|------------------------|--------------------|--------------------|--------------------------|---------------------------------------|
|             |              | °C          |           | µS<br>cm <sup>-1</sup> | mg L <sup>-1</sup> | mg L <sup>-1</sup> | cm <sup>-1</sup>         | L mg <sup>-1</sup><br>m <sup>-1</sup> |
| <i>LIN</i>  | Mar          | 5.0         | 7.7       | 153                    | 0.82               | 2.2                | 0.043                    | 2.0                                   |
|             | May          | 12.4        | 7.7       | 154                    | 0.63               | 2.8                | 0.043                    | 1.6                                   |
|             | Aug          | 23.2        | 7.9       | 145                    | 0.40               | 3.0                | 0.046                    | 1.5                                   |
|             | Nov          | 3.3         | 7.6       | 149                    | 0.47               | 2.8                | 0.039                    | 1.4                                   |
|             | Jan          | 1.2         | 7.6       | 150                    | 0.59               | 2.4                | 0.037                    | 1.5                                   |
| <i>NOR</i>  | Mar          | 1.8         | 7.6       | 176                    | 0.69               | 6.4                | 0.244                    | 3.8                                   |
|             | May          | 10.9        | 7.6       | 178                    | 0.77               | 5.6                | 0.221                    | 3.9                                   |
|             | Aug          | 17.1        | 7.6       | 189                    | 0.49               | 7.0                | 0.171                    | 2.4                                   |
|             | Nov          | 5.8         | 7.8       | 195                    | 0.48               | 6.4                | 0.168                    | 2.6                                   |
|             | Jan          | 1.9         | 7.7       | 201                    | 0.51               | 6.0                | 0.159                    | 2.7                                   |
| <i>STO</i>  | Mar          | 5.0         | 7.8       | 225                    | 0.66               | 7.5                | 0.231                    | 3.1                                   |
|             | May          | 6.9         | 8.0       | 216                    | 0.57               | 7.8                | 0.222                    | 2.9                                   |
|             | Aug          | 11.1        | 7.4       | 210                    | 0.59               | 7.9                | 0.213                    | 2.7                                   |
|             | Nov          | 9.0         | 7.8       | 200                    | 0.55               | 7.3                | 0.198                    | 2.7                                   |
|             | Jan          | 1.8         | 7.8       | 203                    | 0.55               | 7.0                | 0.195                    | 2.8                                   |
| <i>MAL</i>  | Mar          | 9.0         | 7.4       | 719                    | 1.30               | 2.6                | NR                       | NR                                    |
|             | May          | 10.1        | 7.3       | 720                    | 1.43               | 2.7                | NR                       | NR                                    |
|             | Aug          | 10.2        | 7.3       | 718                    | 1.39               | 2.6                | NR                       | NR                                    |
|             | Nov          | 9.3         | 7.3       | 741                    | 1.46               | 2.9                | NR                       | NR                                    |
|             | Jan          | 8.8         | 7.2       | 747                    | 1.63               | 2.4                | NR                       | NR                                    |

**Table S2.** Counts of  $m/z$  ions and computed weighted indices of molecular formulae detected in the source water of LIN, NOR, STO and MAL throughout five sample occasions combined as computed from negative electrospray 12T FT-ICR mass spectra for singly charged ions reported in neutral form (the mass of a proton added).

| Number of DOM compositions                  | LIN   | NOR   | STO   | MAL   |
|---------------------------------------------|-------|-------|-------|-------|
| Total                                       | 10398 | 12642 | 10379 | 10521 |
| CHO                                         | 7326  | 8775  | 7746  | 7214  |
| CHNO                                        | 2245  | 2476  | 1698  | 2318  |
| CHOS                                        | 802   | 1341  | 931   | 940   |
| CHONS                                       | 25    | 50    | 4     | 49    |
| Characteristics of CHO compositions         |       |       |       |       |
| average H [%]                               | 45.2  | 43.5  | 43.7  | 44.6  |
| average C [%]                               | 36.9  | 37.7  | 37.6  | 37.8  |
| average O [%]                               | 18.0  | 18.8  | 18.7  | 17.5  |
| computed average H/C ratio                  | 1.23  | 1.15  | 1.16  | 1.18  |
| computed average O/C ratio                  | 0.49  | 0.50  | 0.50  | 0.46  |
| average carbon oxidation state ( $C_{OS}$ ) | -0.24 | -0.14 | -0.15 | -0.24 |
| average DBE                                 | 8.1   | 9.0   | 9.0   | 9.0   |
| average DBE/C                               | 0.44  | 0.48  | 0.47  | 0.46  |
| average $AI_{mod}$                          | 0.26  | 0.30  | 0.29  | 0.30  |
| mass weighted average [Da]                  | 386.9 | 397.6 | 406.8 | 403.4 |
| Characteristics of CHNO compositions        |       |       |       |       |
| average H [%]                               | 42.8  | 40.8  | 41.1  | 42.1  |
| average C [%]                               | 37.0  | 38.1  | 37.8  | 38.3  |
| average O [%]                               | 18.0  | 19.0  | 19.0  | 17.5  |
| average N [%]                               | 2.1   | 2.1   | 2.1   | 2.1   |
| computed average H/C ratio                  | 1.16  | 1.07  | 1.09  | 1.10  |
| computed average O/C ratio                  | 0.49  | 0.50  | 0.50  | 0.46  |
| computed average N/C ratio                  | 0.06  | 0.06  | 0.06  | 0.05  |
| average carbon oxidation state ( $C_{OS}$ ) | -0.18 | -0.07 | -0.08 | -0.18 |
| average DBE                                 | 8.9   | 9.8   | 9.7   | 9.9   |
| average DBE/C                               | 0.51  | 0.55  | 0.54  | 0.53  |
| average $AI_{mod}$                          | 0.31  | 0.36  | 0.35  | 0.35  |
| mass weighted average [Da]                  | 380.5 | 390.2 | 391.7 | 395.0 |
| Characteristics of CHOS compositions        |       |       |       |       |
| average H [%]                               | 46.4  | 44.5  | 46.3  | 43.8  |
| average C [%]                               | 33.9  | 34.8  | 34.1  | 36.0  |
| average O [%]                               | 17.6  | 18.6  | 17.5  | 18.1  |
| average S [%]                               | 2.1   | 2.1   | 2.1   | 2.1   |
| computed average H/C ratio                  | 1.37  | 1.28  | 1.36  | 1.21  |
| computed average O/C ratio                  | 0.52  | 0.53  | 0.51  | 0.50  |
| computed average S/C ratio                  | 0.06  | 0.06  | 0.06  | 0.06  |
| average carbon oxidation state ( $C_{OS}$ ) | -0.32 | -0.20 | -0.33 | -0.21 |
| average DBE                                 | 6.1   | 7.0   | 6.3   | 7.7   |
| average DBE/C                               | 0.38  | 0.42  | 0.38  | 0.45  |
| average $AI_{mod}$                          | 0.16  | 0.21  | 0.17  | 0.27  |
| mass weighted average [Da]                  | 383.7 | 394.6 | 386.9 | 393.3 |



**Table S3.** Water characteristics in LIN, NOR, STO and MAL at the point right before chemical disinfection. The average concentration of two replicates is reported for total nitrogen (TN), with standard deviation <0.01 mg L<sup>-1</sup> (LIN, NOR, STO) and <0.04 mg L<sup>-1</sup> (MAL).

| <i>DWTP</i> | <i>Month</i> | <i>Temp</i> | <i>pH</i> | <i>Cond.</i>           | <i>TN</i>          | <i>DOC</i>         | <i>UVA<sub>254</sub></i> | <i>SUVA</i>                           |
|-------------|--------------|-------------|-----------|------------------------|--------------------|--------------------|--------------------------|---------------------------------------|
|             |              | °C          |           | µS<br>cm <sup>-1</sup> | mg L <sup>-1</sup> | mg L <sup>-1</sup> | cm <sup>-1</sup>         | L mg <sup>-1</sup><br>m <sup>-1</sup> |
| <i>LIN</i>  | Mar          | 3.4         | 7.7       | 158                    | 0.81               | 1.7                | 0.036                    | 2.1                                   |
|             | May          | 13.6        | 7.4       | 159                    | 0.59               | 2.0                | 0.029                    | 1.5                                   |
|             | Aug          | 22.4        | 7.3       | 151                    | 0.36               | 1.6                | 0.026                    | 1.6                                   |
|             | Nov          | 3.8         | 7.4       | 150                    | 0.44               | 2.2                | 0.029                    | 1.3                                   |
|             | Jan          | 1.1         | 7.5       | 153                    | 0.56               | 1.9                | 0.030                    | 1.6                                   |
| <i>NOR</i>  | Mar          | 5.1         | 7.1       | 223                    | 0.49               | 2.3                | 0.049                    | 2.1                                   |
|             | May          | 12.8        | 7.2       | 224                    | 0.63               | 2.9                | 0.048                    | 1.7                                   |
|             | Aug          | 18.3        | 7.1       | 236                    | 0.32               | 2.9                | 0.041                    | 1.4                                   |
|             | Nov          | 6.1         | 7.1       | 236                    | 0.33               | 2.9                | 0.044                    | 1.5                                   |
|             | Jan          | 1.5         | 7.1       | 240                    | 0.36               | 2.8                | 0.043                    | 1.5                                   |
| <i>STO</i>  | Mar          | 5.4         | 7.0       | 244                    | 0.52               | 4.3                | 0.083                    | 1.9                                   |
|             | May          | 7.3         | 6.9       | 233                    | 0.42               | 4.2                | 0.077                    | 1.8                                   |
|             | Aug          | 10.7        | 6.8       | 222                    | 0.46               | 4.6                | 0.079                    | 1.7                                   |
|             | Nov          | 8.5         | 6.8       | 211                    | 0.41               | 4.2                | 0.076                    | 1.8                                   |
|             | Jan          | 2.0         | 6.9       | 213                    | 0.43               | 4.1                | 0.079                    | 1.9                                   |
| <i>MAL</i>  | Mar          | 9.1         | 8.1       | 373                    | 1.25               | 2.4                | 0.057                    | 2.4                                   |
|             | May          | 10.4        | 8.0       | 388                    | 1.27               | 2.3                | 0.058                    | 2.5                                   |
|             | Aug          | 10.6        | 8.2       | 365                    | 1.19               | 2.3                | 0.057                    | 2.5                                   |
|             | Nov          | 9.6         | 8.1       | 381                    | 1.21               | 2.4                | 0.053                    | 2.2                                   |
|             | Jan          | 8.7         | 8.0       | 383                    | 1.43               | 2.2                | 0.051                    | 2.3                                   |

**Table S4.** Counts of  $m/z$  ions and computed weighted indices of molecular formulae detected at the point right before chemical disinfection at LIN, NOR, STO and MAL throughout five sample occasions combined as computed from negative electrospray 12T FT-ICR mass spectra for singly charged ions reported in neutral form (the mass of a proton added).

| Number of DOM compositions                  | LIN   | NOR   | STO   | MAL   |
|---------------------------------------------|-------|-------|-------|-------|
| Total                                       | 10016 | 12652 | 9889  | 10882 |
| CHO                                         | 6981  | 8008  | 7082  | 7130  |
| CHNO                                        | 2159  | 2760  | 1693  | 2568  |
| CHOS                                        | 851   | 1683  | 1065  | 1089  |
| CHONS                                       | 25    | 201   | 49    | 95    |
| Characteristics of CHO compositions         |       |       |       |       |
| average H [%]                               | 44.6  | 45.6  | 45.5  | 44.2  |
| average C [%]                               | 36.9  | 37.1  | 37.1  | 37.8  |
| average O [%]                               | 18.5  | 17.3  | 17.4  | 18.0  |
| computed average H/C ratio                  | 1.21  | 1.23  | 1.23  | 1.17  |
| computed average O/C ratio                  | 0.50  | 0.47  | 0.47  | 0.48  |
| average carbon oxidation state ( $C_{OS}$ ) | -0.19 | -0.28 | -0.27 | -0.21 |
| average DBE                                 | 8.3   | 8.3   | 8.5   | 9.1   |
| average DBE/C                               | 0.45  | 0.44  | 0.44  | 0.47  |
| average $AI_{mod}$                          | 0.26  | 0.27  | 0.27  | 0.30  |
| mass weighted average [Da]                  | 393.4 | 391.3 | 402.3 | 405.5 |
| Characteristics of CHNO compositions        |       |       |       |       |
| average H [%]                               | 42.4  | 42.8  | 42.7  | 41.4  |
| average C [%]                               | 37.1  | 37.4  | 37.5  | 38.5  |
| average O [%]                               | 18.5  | 17.6  | 17.8  | 18.0  |
| average N [%]                               | 2.1   | 2.1   | 2.1   | 2.1   |
| computed average H/C ratio                  | 1.14  | 1.14  | 1.14  | 1.08  |
| computed average O/C ratio                  | 0.50  | 0.47  | 0.47  | 0.47  |
| computed average N/C ratio                  | 0.057 | 0.055 | 0.055 | 0.053 |
| average carbon oxidation state ( $C_{OS}$ ) | -0.14 | -0.19 | -0.18 | -0.14 |
| average DBE                                 | 9.1   | 9.2   | 9.3   | 10.1  |
| average DBE/C                               | 0.51  | 0.51  | 0.51  | 0.54  |
| average $AI_{mod}$                          | 0.34  | 0.35  | 0.35  | 0.39  |
| mass weighted average [Da]                  | 387.9 | 387.6 | 392.3 | 399.6 |
| Characteristics of CHOS compositions        |       |       |       |       |
| average H [%]                               | 45.8  | 45.0  | 46.2  | 43.5  |
| average C [%]                               | 33.9  | 34.9  | 34.5  | 35.9  |
| average O [%]                               | 18.2  | 18.0  | 17.3  | 18.5  |
| average S [%]                               | 2.1   | 2.1   | 2.0   | 2.1   |
| computed average H/C ratio                  | 1.35  | 1.29  | 1.34  | 1.21  |
| computed average O/C ratio                  | 0.54  | 0.52  | 0.50  | 0.51  |
| computed average S/C ratio                  | 0.061 | 0.060 | 0.059 | 0.059 |
| average carbon oxidation state ( $C_{OS}$ ) | -0.27 | -0.25 | -0.33 | -0.18 |
| average DBE                                 | 6.3   | 6.9   | 6.6   | 7.7   |
| average DBE/C                               | 0.39  | 0.42  | 0.39  | 0.45  |
| average $AI_{mod}$                          | 0.08  | 0.14  | 0.11  | 0.20  |
| mass weighted average [Da]                  | 391.5 | 391.7 | 392.4 | 394.8 |

**Table S5.** Counts of  $m/z$  ions and computed weighted indices of molecular formulae, focused on DOM, detected at the point right after chemical disinfection at LIN, NOR, STO and MAL throughout five sample occasions combined as computed from negative electrospray 12T FT-ICR mass spectra for singly charged ions reported in neutral form (the mass of a proton added).

| Number of DOM compositions                  | LIN   | NOR   | STO   | MAL   |
|---------------------------------------------|-------|-------|-------|-------|
| Total                                       | 9806  | 11961 | 9794  | 10046 |
| CHO                                         | 6788  | 7689  | 6967  | 6727  |
| CHNO                                        | 2193  | 2706  | 1679  | 2356  |
| CHOS                                        | 816   | 1463  | 1120  | 938   |
| CHONS                                       | 9     | 103   | 28    | 25    |
| <b>Characteristics of CHO compositions</b>  |       |       |       |       |
| average H [%]                               | 44.4  | 45.7  | 45.5  | 44.4  |
| average C [%]                               | 36.9  | 37.1  | 37.1  | 37.6  |
| average O [%]                               | 18.7  | 17.2  | 17.4  | 18.0  |
| computed average H/C ratio                  | 1.21  | 1.23  | 1.23  | 1.18  |
| computed average O/C ratio                  | 0.51  | 0.46  | 0.47  | 0.48  |
| average carbon oxidation state ( $C_{OS}$ ) | -0.18 | -0.29 | -0.27 | -0.21 |
| average DBE                                 | 8.3   | 8.2   | 8.5   | 9.0   |
| average DBE/C                               | 0.45  | 0.44  | 0.44  | 0.46  |
| average $AI_{mod}$                          | 0.26  | 0.27  | 0.27  | 0.29  |
| mass weighted average [Da]                  | 390.9 | 387.6 | 400.5 | 403.8 |
| <b>Characteristics of CHNO compositions</b> |       |       |       |       |
| average H [%]                               | 42.1  | 42.7  | 42.7  | 41.6  |
| average C [%]                               | 36.9  | 37.4  | 37.3  | 38.1  |
| average O [%]                               | 18.9  | 17.8  | 17.9  | 18.2  |
| average N [%]                               | 2.1   | 2.1   | 2.1   | 2.1   |
| computed average H/C ratio                  | 1.14  | 1.14  | 1.14  | 1.09  |
| computed average O/C ratio                  | 0.51  | 0.48  | 0.48  | 0.48  |
| computed average N/C ratio                  | 0.06  | 0.06  | 0.06  | 0.05  |
| average carbon oxidation state ( $C_{OS}$ ) | -0.11 | -0.18 | -0.18 | -0.13 |
| average DBE                                 | 9.0   | 9.1   | 9.2   | 9.9   |
| average DBE/C                               | 0.52  | 0.51  | 0.51  | 0.54  |
| average $AI_{mod}$                          | 0.33  | 0.35  | 0.34  | 0.38  |
| mass weighted average [Da]                  | 385.8 | 383.0 | 389.9 | 396.9 |
| <b>Characteristics of CHOS compositions</b> |       |       |       |       |
| average H [%]                               | 46.6  | 45.5  | 46.4  | 44.1  |
| average C [%]                               | 33.6  | 34.6  | 34.3  | 35.8  |
| average O [%]                               | 17.8  | 17.9  | 17.3  | 18.1  |
| average S [%]                               | 2.1   | 2.1   | 2.0   | 2.1   |
| computed average H/C ratio                  | 1.39  | 1.32  | 1.35  | 1.23  |
| computed average O/C ratio                  | 0.53  | 0.52  | 0.50  | 0.51  |
| computed average S/C ratio                  | 0.06  | 0.06  | 0.06  | 0.06  |
| average carbon oxidation state ( $C_{OS}$ ) | -0.32 | -0.27 | -0.34 | -0.23 |
| average DBE                                 | 6.0   | 6.7   | 6.5   | 7.6   |
| average DBE/C                               | 0.37  | 0.40  | 0.38  | 0.44  |
| average $AI_{mod}$                          | 0.06  | 0.12  | 0.10  | 0.17  |
| mass weighted average [Da]                  | 389.3 | 390.6 | 394.0 | 396.2 |

**Table S6.** Counts of  $m/z$  ions and computed weighted indices of molecular formulae, focused on DOM, detected in the tap waters at LIN, NOR, STO and MAL throughout five sample occasions combined as computed from negative electrospray 12T FT-ICR mass spectra for singly charged ions reported in neutral form (the mass of a proton added).

| Number of DOM compositions                  | LIN   | NOR   | STO   | MAL   |
|---------------------------------------------|-------|-------|-------|-------|
| Total                                       | 10097 | 11813 | 10569 | 9718  |
| CHO                                         | 7068  | 7659  | 7438  | 6334  |
| CHNO                                        | 2226  | 2657  | 1955  | 2330  |
| CHOS                                        | 793   | 1403  | 1140  | 1012  |
| CHONS                                       | 10    | 94    | 36    | 42    |
| Characteristics of CHO compositions         |       |       |       |       |
| average H [%]                               | 44.7  | 45.8  | 45.7  | 44.8  |
| average C [%]                               | 36.9  | 37.1  | 37.1  | 37.4  |
| average O [%]                               | 18.4  | 17.2  | 17.2  | 17.8  |
| computed average H/C ratio                  | 1.21  | 1.23  | 1.23  | 1.20  |
| computed average O/C ratio                  | 0.50  | 0.46  | 0.46  | 0.48  |
| average carbon oxidation state ( $C_{OS}$ ) | -0.20 | -0.29 | -0.29 | -0.23 |
| average DBE                                 | 8.2   | 8.2   | 8.4   | 8.7   |
| average DBE/C                               | 0.45  | 0.44  | 0.44  | 0.45  |
| average $AI_{mod}$                          | 0.27  | 0.26  | 0.27  | 0.28  |
| mass weighted average [Da]                  | 387.2 | 389.4 | 399.3 | 397.4 |
| Characteristics of CHNO compositions        |       |       |       |       |
| average H [%]                               | 42.3  | 42.9  | 42.7  | 42.0  |
| average C [%]                               | 37.0  | 37.3  | 37.4  | 37.7  |
| average O [%]                               | 18.5  | 17.7  | 17.9  | 18.2  |
| average N [%]                               | 2.1   | 2.1   | 2.1   | 2.1   |
| computed average H/C ratio                  | 1.14  | 1.15  | 1.14  | 1.11  |
| computed average O/C ratio                  | 0.50  | 0.48  | 0.48  | 0.48  |
| computed average N/C ratio                  | 0.06  | 0.06  | 0.06  | 0.05  |
| average carbon oxidation state ( $C_{OS}$ ) | -0.14 | -0.19 | -0.18 | -0.14 |
| average DBE                                 | 8.9   | 9.1   | 9.3   | 9.6   |
| average DBE/C                               | 0.52  | 0.51  | 0.51  | 0.53  |
| average $AI_{mod}$                          | 0.34  | 0.34  | 0.34  | 0.36  |
| mass weighted average [Da]                  | 380.5 | 385.6 | 391.2 | 394.9 |
| Characteristics of CHOS compositions        |       |       |       |       |
| average H [%]                               | 46.2  | 45.4  | 46.4  | 46.8  |
| average C [%]                               | 33.7  | 34.6  | 34.3  | 34.1  |
| average O [%]                               | 18.0  | 17.9  | 17.3  | 17.1  |
| average S [%]                               | 2.1   | 2.1   | 2.0   | 2.0   |
| computed average H/C ratio                  | 1.37  | 1.31  | 1.35  | 1.38  |
| computed average O/C ratio                  | 0.53  | 0.52  | 0.50  | 0.50  |
| computed average S/C ratio                  | 0.06  | 0.06  | 0.06  | 0.06  |
| average carbon oxidation state ( $C_{OS}$ ) | -0.30 | -0.27 | -0.34 | -0.38 |
| average DBE                                 | 6.1   | 6.7   | 6.5   | 6.2   |
| average DBE/C                               | 0.38  | 0.40  | 0.38  | 0.37  |
| average $AI_{mod}$                          | 0.07  | 0.12  | 0.10  | 0.08  |
| mass weighted average [Da]                  | 389.3 | 392.0 | 391.2 | 390.6 |

**Table S7.** Counts of  $m/z$  ions and computed weighted indices of DBP molecular formulae detected both after disinfection and in tap water (left column) and those solely detected in tap waters (right column) of LIN, NOR, STO and MAL throughout five sampling occasions as computed from negative electrospray 12T FT-ICR mass spectra for singly charged ions reported in neutral form (the mass of a proton added).

| DBP characteristics                         | LIN          |             | NOR          |             | STO          |             | MAL          |             |
|---------------------------------------------|--------------|-------------|--------------|-------------|--------------|-------------|--------------|-------------|
|                                             | DWTP<br>+Tap | Tap<br>only | DWTP<br>+Tap | Tap<br>only | DWTP<br>+Tap | Tap<br>only | DWTP<br>+Tap | Tap<br>only |
| number of DBP compositions                  | 74           | 30          | 145          | 42          | 59           | 14          | 14           | 110         |
| average H [%]                               | 38.9         | 40.7        | 39.9         | 39.1        | 44.5         | 47.4        | 41.2         | 40.2        |
| average C [%]                               | 37.6         | 38.3        | 37.8         | 38.2        | 37.0         | 36.9        | 38.2         | 37.5        |
| average O [%]                               | 20.7         | 17.6        | 19.5         | 19.8        | 15.9         | 12.6        | 18.3         | 18.9        |
| average N [%]                               | 0            | 0.16        | 0            | 0.03        | 0            | 0.14        | 0            | 0.05        |
| average S [%]                               | 0            | 0.05        | 0.01         | 0.00        | 0.02         | 0           | 0            | 0.02        |
| average Cl [%]                              | 2.8          | 2.9         | 2.8          | 2.7         | 2.3          | 2.2         | 2.3          | 3.3         |
| average Br [%]                              | 0            | 0.2         | 0.03         | 0.1         | 0.3          | 0.7         | 0            | 0.04        |
| computed average H/C ratio                  | 1.04         | 1.06        | 1.06         | 1.02        | 1.20         | 1.28        | 1.08         | 1.07        |
| computed average O/C ratio                  | 0.55         | 0.46        | 0.51         | 0.52        | 0.43         | 0.34        | 0.48         | 0.50        |
| average carbon oxidation state ( $C_{OS}$ ) | 0.15         | 0.01        | 0.06         | 0.12        | -0.27        | -0.53       | -0.06        | 0.06        |
| average DBE                                 | 7.8          | 7.9         | 7.8          | 8.5         | 6.8          | 6.4         | 8.1          | 7.7         |
| average DBE/C                               | 0.51         | 0.49        | 0.50         | 0.51        | 0.43         | 0.38        | 0.49         | 0.48        |
| average $AI_{mod}$                          | 0.38         | 0.40        | 0.38         | 0.39        | 0.32         | 0.30        | 0.37         | 0.37        |
| mass weighted average [Da]                  | 372.5        | 379.9       | 372.8        | 403.1       | 369.0        | 378.2       | 377.8        | 386.7       |

**Table S8.** List of verified DBP molecular compositions detected both after chemical disinfection and in tap water at the four DWTPs, LIN, NOR, STO and MAL, including data for all five sampling occasions. Note that each DBP formula is reported once for each DWTP, even though they were detected at multiple sampling occasions.

| DWTP | DBP Formula<br>Neutral form | Theoretical Mass<br>Negative Ion |
|------|-----------------------------|----------------------------------|
| LIN  | C12 H12 O7 Cl2              | 336.98874                        |
| LIN  | C12 H12 O8 Cl2              | 352.98365                        |
| LIN  | C12 H8 O7 Cl2               | 332.95744                        |
| LIN  | C13 H10 O9 Cl2              | 378.96292                        |
| LIN  | C13 H11 O7 Cl1              | 313.01206                        |
| LIN  | C13 H11 O8 Cl1              | 329.00697                        |
| LIN  | C13 H12 O9 Cl2              | 380.97857                        |
| LIN  | C13 H13 O7 Cl1              | 315.02771                        |
| LIN  | C13 H13 O9 Cl1              | 347.01754                        |
| LIN  | C13 H14 O7 Cl2              | 351.00439                        |
| LIN  | C13 H14 O8 Cl2              | 366.9993                         |
| LIN  | C13 H15 O8 Cl1              | 333.03827                        |
| LIN  | C14 H10 O8 Cl2              | 374.968                          |
| LIN  | C14 H11 O8 Cl1              | 341.00697                        |
| LIN  | C14 H12 O10 Cl2             | 408.97348                        |
| LIN  | C14 H12 O8 Cl2              | 376.98365                        |
| LIN  | C14 H12 O9 Cl2              | 392.97857                        |
| LIN  | C14 H13 O7 Cl1              | 327.02771                        |
| LIN  | C14 H13 O8 Cl1              | 343.02262                        |
| LIN  | C14 H13 O9 Cl1              | 359.01754                        |
| LIN  | C14 H14 O8 Cl2              | 378.9993                         |
| LIN  | C14 H14 O9 Cl2              | 394.99422                        |
| LIN  | C14 H15 O7 Cl1              | 329.04336                        |
| LIN  | C14 H15 O8 Cl1              | 345.03827                        |
| LIN  | C14 H15 O9 Cl1              | 361.03319                        |
| LIN  | C14 H16 O9 Cl2              | 397.00987                        |
| LIN  | C14 H17 O7 Cl1              | 331.05901                        |
| LIN  | C14 H17 O8 Cl1              | 347.05392                        |
| LIN  | C15 H13 O10 Cl1             | 387.01245                        |
| LIN  | C15 H13 O8 Cl1              | 355.02262                        |
| LIN  | C15 H13 O9 Cl1              | 371.01754                        |
| LIN  | C15 H14 O9 Cl2              | 406.99422                        |
| LIN  | C15 H15 O10 Cl1             | 389.0281                         |
| LIN  | C15 H15 O7 Cl1              | 341.04336                        |
| LIN  | C15 H15 O8 Cl1              | 357.03827                        |
| LIN  | C15 H15 O9 Cl1              | 373.03319                        |
| LIN  | C15 H16 O7 Cl2              | 377.02004                        |
| LIN  | C15 H16 O8 Cl2              | 393.01495                        |
| LIN  | C15 H16 O9 Cl2              | 409.00987                        |
| LIN  | C15 H17 O10 Cl1             | 391.04375                        |

|     |                 |           |
|-----|-----------------|-----------|
| LIN | C15 H17 O7 Cl1  | 343.05901 |
| LIN | C15 H17 O8 Cl1  | 359.05392 |
| LIN | C15 H19 O7 Cl1  | 345.07466 |
| LIN | C15 H19 O8 Cl1  | 361.06957 |
| LIN | C16 H13 O10 Cl1 | 399.01245 |
| LIN | C16 H13 O9 Cl1  | 383.01754 |
| LIN | C16 H14 O9 Cl2  | 418.99422 |
| LIN | C16 H15 O10 Cl1 | 401.0281  |
| LIN | C16 H15 O11 Cl1 | 417.02302 |
| LIN | C16 H15 O8 Cl1  | 369.03827 |
| LIN | C16 H15 O9 Cl1  | 385.03319 |
| LIN | C16 H17 O10 Cl1 | 403.04375 |
| LIN | C16 H17 O7 Cl1  | 355.05901 |
| LIN | C16 H17 O8 Cl1  | 371.05392 |
| LIN | C16 H17 O9 Cl1  | 387.04884 |
| LIN | C16 H19 O7 Cl1  | 357.07466 |
| LIN | C16 H19 O8 Cl1  | 373.06957 |
| LIN | C16 H19 O9 Cl1  | 389.06449 |
| LIN | C16 H21 O7 Cl1  | 359.09031 |
| LIN | C16 H21 O8 Cl1  | 375.08522 |
| LIN | C17 H17 O10 Cl1 | 415.04375 |
| LIN | C17 H17 O9 Cl1  | 399.04884 |
| LIN | C17 H19 O7 Cl1  | 369.07466 |
| LIN | C17 H19 O8 Cl1  | 385.06957 |
| LIN | C17 H19 O9 Cl1  | 401.06449 |
| LIN | C17 H21 O9 Cl1  | 403.08014 |
| LIN | C18 H17 O10 Cl1 | 427.04375 |
| LIN | C18 H19 O10 Cl1 | 429.0594  |
| LIN | C18 H19 O8 Cl1  | 397.06957 |
| LIN | C18 H19 O9 Cl1  | 413.06449 |
| LIN | C18 H21 O10 Cl1 | 431.07505 |
| LIN | C18 H21 O9 Cl1  | 415.08014 |
| LIN | C18 H23 O8 Cl1  | 401.10087 |
| LIN | C18 H25 O7 Cl1  | 387.12161 |
| NOR | C11 H12 O7 Cl2  | 324.98874 |
| NOR | C12 H10 O7 Cl2  | 334.97309 |
| NOR | C12 H11 O7 Cl1  | 301.01206 |
| NOR | C12 H12 O7 Cl2  | 336.98874 |
| NOR | C12 H12 O8 Cl2  | 352.98365 |
| NOR | C12 H13 O6 Cl1  | 287.03279 |
| NOR | C12 H13 O7 Cl1  | 303.02771 |
| NOR | C12 H14 O7 Cl2  | 339.00439 |
| NOR | C12 H14 O8 Cl2  | 354.9993  |
| NOR | C12 H15 O6 Cl1  | 289.04844 |
| NOR | C13 H11 O6 Cl1  | 297.01714 |
| NOR | C13 H11 O7 Cl1  | 313.01206 |
| NOR | C13 H11 O8 Cl1  | 329.00697 |
| NOR | C13 H12 O7 Cl2  | 348.98874 |

|     |                 |           |
|-----|-----------------|-----------|
| NOR | C13 H12 O8 CI2  | 364.98365 |
| NOR | C13 H12 O9 CI2  | 380.97857 |
| NOR | C13 H13 O6 CI1  | 299.03279 |
| NOR | C13 H13 O7 CI1  | 315.02771 |
| NOR | C13 H13 O8 CI1  | 331.02262 |
| NOR | C13 H14 O7 CI2  | 351.00439 |
| NOR | C13 H14 O8 CI2  | 366.9993  |
| NOR | C13 H14 O9 CI2  | 382.99422 |
| NOR | C13 H15 O6 CI1  | 301.04844 |
| NOR | C13 H15 O7 CI1  | 317.04336 |
| NOR | C13 H16 O7 CI2  | 353.02004 |
| NOR | C13 H16 O8 CI2  | 369.01495 |
| NOR | C13 H17 O6 CI1  | 303.06409 |
| NOR | C14 H10 O8 CI2  | 374.968   |
| NOR | C14 H11 O7 CI1  | 325.01206 |
| NOR | C14 H11 O9 CI1  | 357.00189 |
| NOR | C14 H12 O8 CI2  | 376.98365 |
| NOR | C14 H12 O9 CI2  | 392.97857 |
| NOR | C14 H13 O10 CI1 | 375.01245 |
| NOR | C14 H13 O6 CI1  | 311.03279 |
| NOR | C14 H13 O7 CI1  | 327.02771 |
| NOR | C14 H13 O8 CI1  | 343.02262 |
| NOR | C14 H13 O9 CI1  | 359.01754 |
| NOR | C14 H14 O8 CI2  | 378.9993  |
| NOR | C14 H14 O9 CI2  | 394.99422 |
| NOR | C14 H15 O6 CI1  | 313.04844 |
| NOR | C14 H15 O7 CI1  | 329.04336 |
| NOR | C14 H15 O8 CI1  | 345.03827 |
| NOR | C14 H15 O9 CI1  | 361.03319 |
| NOR | C14 H16 O7 CI2  | 365.02004 |
| NOR | C14 H16 O8 CI2  | 381.01495 |
| NOR | C14 H17 O6 CI1  | 315.06409 |
| NOR | C14 H17 O7 CI1  | 331.05901 |
| NOR | C14 H17 O8 CI1  | 347.05392 |
| NOR | C14 H19 O7 CI1  | 333.07466 |
| NOR | C15 H11 O8 CI1  | 353.00697 |
| NOR | C15 H11 O9 CI1  | 369.00189 |
| NOR | C15 H12 O8 CI2  | 388.98365 |
| NOR | C15 H12 O9 CI2  | 404.97857 |
| NOR | C15 H13 O10 CI1 | 387.01245 |
| NOR | C15 H13 O7 CI1  | 339.02771 |
| NOR | C15 H13 O8 CI1  | 355.02262 |
| NOR | C15 H13 O9 CI1  | 371.01754 |
| NOR | C15 H14 O8 CI2  | 390.9993  |
| NOR | C15 H14 O9 CI2  | 406.99422 |
| NOR | C15 H15 O10 CI1 | 389.0281  |
| NOR | C15 H15 O7 CI1  | 341.04336 |
| NOR | C15 H15 O8 CI1  | 357.03827 |



|     |                    |           |
|-----|--------------------|-----------|
| NOR | C15 H15 O9 CI1     | 373.03319 |
| NOR | C15 H16 O7 CI2     | 377.02004 |
| NOR | C15 H16 O8 CI2     | 393.01495 |
| NOR | C15 H16 O9 CI2     | 409.00987 |
| NOR | C15 H17 O6 CI1     | 327.06409 |
| NOR | C15 H17 O7 CI1     | 343.05901 |
| NOR | C15 H17 O8 CI1     | 359.05392 |
| NOR | C15 H17 O9 CI1     | 375.04884 |
| NOR | C15 H18 O8 CI2     | 395.0306  |
| NOR | C15 H19 O6 CI1     | 329.07974 |
| NOR | C15 H19 O7 CI1     | 345.07466 |
| NOR | C15 H19 O8 CI1     | 361.06957 |
| NOR | C15 H30 O3 CI1 Br1 | 371.09941 |
| NOR | C16 H11 O10 CI1    | 396.9968  |
| NOR | C16 H12 O9 CI2     | 416.97857 |
| NOR | C16 H13 O10 CI1    | 399.01245 |
| NOR | C16 H13 O8 CI1     | 367.02262 |
| NOR | C16 H13 O9 CI1     | 383.01754 |
| NOR | C16 H14 O8 CI2     | 402.9993  |
| NOR | C16 H14 O9 CI2     | 418.99422 |
| NOR | C16 H15 O10 CI1    | 401.0281  |
| NOR | C16 H15 O7 CI1     | 353.04336 |
| NOR | C16 H15 O8 CI1     | 369.03827 |
| NOR | C16 H15 O9 CI1     | 385.03319 |
| NOR | C16 H16 O8 CI2     | 405.01495 |
| NOR | C16 H17 O10 CI1    | 403.04375 |
| NOR | C16 H17 O6 CI1     | 339.06409 |
| NOR | C16 H17 O7 CI1     | 355.05901 |
| NOR | C16 H17 O8 CI1     | 371.05392 |
| NOR | C16 H17 O9 CI1     | 387.04884 |
| NOR | C16 H18 O10 CI2    | 439.02043 |
| NOR | C16 H18 O8 CI2     | 407.0306  |
| NOR | C16 H18 O9 CI2     | 423.02552 |
| NOR | C16 H19 O6 CI1     | 341.07974 |
| NOR | C16 H19 O7 CI1     | 357.07466 |
| NOR | C16 H19 O8 CI1     | 373.06957 |
| NOR | C16 H19 O9 CI1     | 389.06449 |
| NOR | C16 H21 O7 CI1     | 359.09031 |
| NOR | C16 H21 O8 CI1     | 375.08522 |
| NOR | C17 H13 O10 CI1    | 411.01245 |
| NOR | C17 H15 O10 CI1    | 413.0281  |
| NOR | C17 H15 O8 CI1     | 381.03827 |
| NOR | C17 H15 O9 CI1     | 397.03319 |
| NOR | C17 H16 O10 CI2    | 449.00478 |
| NOR | C17 H17 O10 CI1    | 415.04375 |
| NOR | C17 H17 O7 CI1     | 367.05901 |
| NOR | C17 H17 O8 CI1     | 383.05392 |
| NOR | C17 H17 O9 CI1     | 399.04884 |

|     |                       |           |
|-----|-----------------------|-----------|
| NOR | C17 H18 O9 Cl2        | 435.02552 |
| NOR | C17 H19 O10 Cl1       | 417.0594  |
| NOR | C17 H19 O6 Cl1        | 353.07974 |
| NOR | C17 H19 O7 Cl1        | 369.07466 |
| NOR | C17 H19 O8 Cl1        | 385.06957 |
| NOR | C17 H19 O9 Cl1        | 401.06449 |
| NOR | C17 H21 O7 Cl1        | 371.09031 |
| NOR | C17 H21 O8 Cl1        | 387.08522 |
| NOR | C17 H21 O9 Cl1        | 403.08014 |
| NOR | C17 H23 O7 Cl1        | 373.10596 |
| NOR | C17 H23 O8 Cl1        | 389.10087 |
| NOR | C18 H15 O9 Cl1        | 409.03319 |
| NOR | C18 H17 O10 Cl1       | 427.04375 |
| NOR | C18 H17 O8 Cl1        | 395.05392 |
| NOR | C18 H17 O9 Cl1        | 411.04884 |
| NOR | C18 H19 O10 Cl1       | 429.0594  |
| NOR | C18 H19 O8 Cl1        | 397.06957 |
| NOR | C18 H19 O9 Cl1        | 413.06449 |
| NOR | C18 H21 O7 Cl1        | 383.09031 |
| NOR | C18 H21 O8 Cl1        | 399.08522 |
| NOR | C18 H21 O9 Cl1        | 415.08014 |
| NOR | C18 H23 O7 Cl1        | 385.10596 |
| NOR | C18 H23 O9 Cl1        | 417.09579 |
| NOR | C18 H32 O1 S1 Cl1 Br1 | 409.0973  |
| NOR | C19 H17 O9 Cl1        | 423.04884 |
| NOR | C19 H19 O10 Cl1       | 441.0594  |
| NOR | C19 H19 O9 Cl1        | 425.06449 |
| NOR | C19 H21 O10 Cl1       | 443.07505 |
| NOR | C19 H21 O8 Cl1        | 411.08522 |
| NOR | C19 H21 O9 Cl1        | 427.08014 |
| NOR | C19 H23 O9 Cl1        | 429.09579 |
| NOR | C19 H25 O9 Cl1        | 431.11144 |
| NOR | C19 H34 O1 S1 Cl1 Br1 | 423.11295 |
| NOR | C20 H19 O9 Cl1        | 437.06449 |
| NOR | C20 H23 O9 Cl1        | 441.09579 |
| STO | C13 H11 O7 Cl1        | 313.01206 |
| STO | C13 H13 O8 Cl1        | 331.02262 |
| STO | C13 H15 O7 Cl1        | 317.04336 |
| STO | C14 H13 O7 Cl1        | 327.02771 |
| STO | C14 H13 O8 Cl1        | 343.02262 |
| STO | C14 H15 O6 Cl1        | 313.04844 |
| STO | C14 H15 O7 Cl1        | 329.04336 |
| STO | C14 H15 O8 Cl1        | 345.03827 |
| STO | C14 H17 O6 Cl1        | 315.06409 |
| STO | C14 H17 O7 Cl1        | 331.05901 |
| STO | C15 H11 O8 Cl1        | 353.00697 |
| STO | C15 H13 O7 Cl1        | 339.02771 |
| STO | C15 H13 O8 Cl1        | 355.02262 |

|     |                       |           |
|-----|-----------------------|-----------|
| STO | C15 H15 O7 CI1        | 341.04336 |
| STO | C15 H15 O8 CI1        | 357.03827 |
| STO | C15 H15 O9 CI1        | 373.03319 |
| STO | C15 H17 O6 CI1        | 327.06409 |
| STO | C15 H17 O7 CI1        | 343.05901 |
| STO | C15 H17 O8 CI1        | 359.05392 |
| STO | C15 H17 O9 CI1        | 375.04884 |
| STO | C15 H19 O6 CI1        | 329.07974 |
| STO | C15 H19 O7 CI1        | 345.07466 |
| STO | C15 H28 O3 CI1 Br1    | 369.08376 |
| STO | C15 H30 O2 CI1 Br1    | 355.1045  |
| STO | C16 H13 O10 CI1       | 399.01245 |
| STO | C16 H13 O9 CI1        | 383.01754 |
| STO | C16 H15 O10 CI1       | 401.0281  |
| STO | C16 H15 O7 CI1        | 353.04336 |
| STO | C16 H15 O8 CI1        | 369.03827 |
| STO | C16 H15 O9 CI1        | 385.03319 |
| STO | C16 H17 O7 CI1        | 355.05901 |
| STO | C16 H17 O8 CI1        | 371.05392 |
| STO | C16 H17 O9 CI1        | 387.04884 |
| STO | C16 H19 O6 CI1        | 341.07974 |
| STO | C16 H19 O7 CI1        | 357.07466 |
| STO | C16 H19 O8 CI1        | 373.06957 |
| STO | C16 H21 O7 CI1        | 359.09031 |
| STO | C16 H32 O2 CI1 Br1    | 369.12015 |
| STO | C17 H17 O7 CI1        | 367.05901 |
| STO | C17 H17 O8 CI1        | 383.05392 |
| STO | C17 H17 O9 CI1        | 399.04884 |
| STO | C17 H19 O7 CI1        | 369.07466 |
| STO | C17 H19 O8 CI1        | 385.06957 |
| STO | C17 H19 O9 CI1        | 401.06449 |
| STO | C17 H21 O7 CI1        | 371.09031 |
| STO | C17 H21 O8 CI1        | 387.08522 |
| STO | C18 H17 O10 CI1       | 427.04375 |
| STO | C18 H19 O10 CI1       | 429.0594  |
| STO | C18 H19 O7 CI1        | 381.07466 |
| STO | C18 H19 O8 CI1        | 397.06957 |
| STO | C18 H19 O9 CI1        | 413.06449 |
| STO | C18 H21 O7 CI1        | 383.09031 |
| STO | C18 H21 O8 CI1        | 399.08522 |
| STO | C18 H21 O9 CI1        | 415.08014 |
| STO | C18 H23 O8 CI1        | 401.10087 |
| STO | C19 H19 O9 CI1        | 425.06449 |
| STO | C19 H21 O9 CI1        | 427.08014 |
| STO | C19 H23 O8 CI1        | 413.10087 |
| STO | C19 H34 O1 S1 CI1 Br1 | 423.11295 |
| MAL | C15 H15 O8 CI1        | 357.03827 |
| MAL | C15 H17 O8 CI1        | 359.05392 |

|     |                 |           |
|-----|-----------------|-----------|
| MAL | C16 H15 O8 Cl1  | 369.03827 |
| MAL | C16 H17 O7 Cl1  | 355.05901 |
| MAL | C16 H17 O8 Cl1  | 371.05392 |
| MAL | C16 H19 O7 Cl1  | 357.07466 |
| MAL | C17 H17 O10 Cl1 | 415.04375 |
| MAL | C17 H17 O8 Cl1  | 383.05392 |
| MAL | C17 H17 O9 Cl1  | 399.04884 |
| MAL | C17 H19 O9 Cl1  | 401.06449 |
| MAL | C18 H19 O8 Cl1  | 397.06957 |
| MAL | C18 H21 O7 Cl1  | 383.09031 |
| MAL | C18 H21 O8 Cl1  | 399.08522 |
| MAL | C18 H21 O9 Cl1  | 415.08014 |

**Table S9.** List of verified DBP molecular compositions detected in tap water samples only, i.e., DBPs detected in tap waters but not right after chemical disinfection, from the four DWTPs, LIN, NOR, STO and MAL, including data for all five sampling occasions. Note that each DBP formula is reported once for each DWTP, even though they were detected at multiple sampling occasions.

| <b>DWTP</b> | <b>DBP Formula<br/>Neutral form</b> | <b>Theoretical Mass<br/>Negative Ion</b> |
|-------------|-------------------------------------|------------------------------------------|
| LIN         | C12 H11 O6 Cl1                      | 285.01714                                |
| LIN         | C12 H11 O7 Cl1                      | 301.01206                                |
| LIN         | C12 H13 O7 Cl1                      | 303.02771                                |
| LIN         | C13 H10 O7 Cl2                      | 346.97309                                |
| LIN         | C13 H10 O8 Cl2                      | 362.968                                  |
| LIN         | C13 H12 O10 Cl2                     | 396.97348                                |
| LIN         | C13 H13 O6 Cl1                      | 299.03279                                |
| LIN         | C13 H15 O7 Cl1                      | 317.04336                                |
| LIN         | C13 H16 O7 Cl2                      | 353.02004                                |
| LIN         | C13 H9 O7 Cl1                       | 310.99641                                |
| LIN         | C13 H9 O8 Cl1                       | 326.99132                                |
| LIN         | C14 H11 O10 Cl1                     | 372.9968                                 |
| LIN         | C14 H14 O10 Cl2                     | 410.98913                                |
| LIN         | C14 H17 O6 Cl1                      | 315.06409                                |
| LIN         | C15 H11 O8 Cl1                      | 353.00697                                |
| LIN         | C15 H12 O8 Cl2                      | 388.98365                                |
| LIN         | C15 H12 O9 Cl2                      | 404.97857                                |
| LIN         | C15 H13 O11 Cl1                     | 403.00737                                |
| LIN         | C15 H19 O6 Cl1                      | 329.07974                                |
| LIN         | C16 H15 O7 Cl1                      | 353.04336                                |
| LIN         | C17 H15 O10 Cl1                     | 413.0281                                 |
| LIN         | C17 H15 O8 Cl1                      | 381.03827                                |
| LIN         | C17 H21 O8 Cl1                      | 387.08522                                |
| LIN         | C18 H15 O9 Cl1                      | 409.03319                                |
| LIN         | C18 H17 O9 Cl1                      | 411.04884                                |
| LIN         | C18 H34 O1 S1 Cl1 Br1               | 411.11295                                |
| LIN         | C20 H21 O10 Cl1                     | 455.07505                                |
| LIN         | C23 H32 O1 N1 Cl2 Br1               | 486.09716                                |
| LIN         | C26 H40 O1 N1 Cl2 Br1               | 530.15976                                |
| LIN         | C27 H38 O1 N1 Cl2 Br1               | 540.14411                                |
| NOR         | C11 H11 O6 Cl1                      | 273.01714                                |
| NOR         | C12 H10 O8 Cl2                      | 350.968                                  |
| NOR         | C12 H13 O8 Cl1                      | 319.02262                                |
| NOR         | C12 H9 O6 Cl1                       | 283.00149                                |
| NOR         | C13 H10 O7 Cl2                      | 346.97309                                |
| NOR         | C13 H13 O9 Cl1                      | 347.01754                                |
| NOR         | C14 H11 O10 Cl1                     | 372.9968                                 |
| NOR         | C14 H12 O7 Cl2                      | 360.98874                                |
| NOR         | C14 H14 O10 Cl2                     | 410.98913                                |
| NOR         | C14 H15 O6 Br1                      | 356.99793                                |

|     |                       |           |
|-----|-----------------------|-----------|
| NOR | C14 H15 O7 Br1        | 372.99284 |
| NOR | C14 H16 O9 Cl2        | 397.00987 |
| NOR | C14 H19 O6 Cl1        | 317.07974 |
| NOR | C15 H10 O9 Cl2        | 402.96292 |
| NOR | C15 H11 O7 Cl1        | 337.01206 |
| NOR | C15 H13 O6 Cl1        | 323.03279 |
| NOR | C15 H16 O10 Cl2       | 425.00478 |
| NOR | C15 H18 O7 Cl2        | 379.03569 |
| NOR | C15 H19 O7 Br1        | 389.02414 |
| NOR | C15 H21 O6 Cl1        | 331.09539 |
| NOR | C15 H9 O9 Cl1         | 366.98624 |
| NOR | C16 H11 O8 Cl1        | 365.00697 |
| NOR | C16 H16 O10 Cl2       | 437.00478 |
| NOR | C17 H13 O9 Cl1        | 395.01754 |
| NOR | C17 H15 O11 Cl1       | 429.02302 |
| NOR | C17 H16 O9 Cl2        | 433.00987 |
| NOR | C18 H13 O10 Cl1       | 423.01245 |
| NOR | C18 H15 O10 Cl1       | 425.0281  |
| NOR | C18 H16 O9 Cl2        | 445.00987 |
| NOR | C18 H21 O10 Cl1       | 431.07505 |
| NOR | C19 H15 O10 Cl1       | 437.0281  |
| NOR | C19 H17 O11 Cl1       | 455.03867 |
| NOR | C19 H19 O11 Cl1       | 457.05432 |
| NOR | C19 H21 O11 Cl1       | 459.06997 |
| NOR | C19 H23 O10 Cl1       | 445.0907  |
| NOR | C19 H23 O8 Cl1        | 413.10087 |
| NOR | C19 H25 O7 Br1        | 443.07109 |
| NOR | C20 H19 O10 Cl1       | 453.0594  |
| NOR | C20 H21 O10 Cl1       | 455.07505 |
| NOR | C20 H21 O9 Cl1        | 439.08014 |
| NOR | C20 H23 O10 Cl1       | 457.0907  |
| NOR | C27 H36 O1 N1 Cl2 Br1 | 538.12846 |
| STO | C13 H9 O7 Cl1         | 310.99641 |
| STO | C14 H13 O6 Cl1        | 311.03279 |
| STO | C14 H28 O4 N1 Br1     | 352.1129  |
| STO | C16 H21 O6 Cl1        | 343.09539 |
| STO | C16 H32 O3 Cl1 Br1    | 385.11506 |
| STO | C17 H15 O10 Cl1       | 413.0281  |
| STO | C17 H15 O7 Cl1        | 365.04336 |
| STO | C17 H15 O8 Cl1        | 381.03827 |
| STO | C17 H23 O8 Cl1        | 389.10087 |
| STO | C17 H30 O1 Cl1 Br1    | 363.10958 |
| STO | C18 H15 O9 Cl1        | 409.03319 |
| STO | C18 H17 O9 Cl1        | 411.04884 |
| STO | C18 H23 O9 Cl1        | 417.09579 |
| STO | C21 H20 O1 Cl2        | 357.08185 |
| MAL | C11 H12 O7 Cl2        | 324.98874 |
| MAL | C12 H12 O8 Cl2        | 352.98365 |

|     |                 |           |
|-----|-----------------|-----------|
| MAL | C12 H13 O6 Cl1  | 287.03279 |
| MAL | C12 H14 O6 Cl2  | 323.00947 |
| MAL | C12 H14 O8 Cl2  | 354.9993  |
| MAL | C13 H10 O8 Cl2  | 362.968   |
| MAL | C13 H11 O8 Cl1  | 329.00697 |
| MAL | C13 H12 O10 Cl2 | 396.97348 |
| MAL | C13 H12 O7 Cl2  | 348.98874 |
| MAL | C13 H12 O9 Cl2  | 380.97857 |
| MAL | C13 H13 O7 Cl1  | 315.02771 |
| MAL | C13 H13 O8 Cl1  | 331.02262 |
| MAL | C13 H13 O9 Cl1  | 347.01754 |
| MAL | C13 H14 O7 Cl2  | 351.00439 |
| MAL | C13 H14 O8 Cl2  | 366.9993  |
| MAL | C13 H14 O9 Cl2  | 382.99422 |
| MAL | C13 H15 O6 Cl1  | 301.04844 |
| MAL | C13 H15 O7 Cl1  | 317.04336 |
| MAL | C13 H15 O8 Cl1  | 333.03827 |
| MAL | C13 H16 O7 Cl2  | 353.02004 |
| MAL | C13 H16 O8 Cl2  | 369.01495 |
| MAL | C14 H10 O8 Cl2  | 374.968   |
| MAL | C14 H12 O10 Cl2 | 408.97348 |
| MAL | C14 H12 O8 Cl2  | 376.98365 |
| MAL | C14 H13 O10 Cl1 | 375.01245 |
| MAL | C14 H13 O7 Cl1  | 327.02771 |
| MAL | C14 H13 O8 Cl1  | 343.02262 |
| MAL | C14 H14 O6 Cl2  | 347.00947 |
| MAL | C14 H14 O7 Cl2  | 363.00439 |
| MAL | C14 H14 O8 Cl2  | 378.9993  |
| MAL | C14 H14 O9 Cl2  | 394.99422 |
| MAL | C14 H15 O7 Cl1  | 329.04336 |
| MAL | C14 H15 O8 Cl1  | 345.03827 |
| MAL | C14 H16 O6 Cl2  | 349.02512 |
| MAL | C14 H16 O8 Cl2  | 381.01495 |
| MAL | C14 H16 O9 Cl2  | 397.00987 |
| MAL | C14 H18 O8 Cl2  | 383.0306  |
| MAL | C14 H19 O7 Cl1  | 333.07466 |
| MAL | C15 H11 O8 Cl1  | 353.00697 |
| MAL | C15 H12 O8 Cl2  | 388.98365 |
| MAL | C15 H12 O9 Cl2  | 404.97857 |
| MAL | C15 H13 O10 Cl1 | 387.01245 |
| MAL | C15 H13 O8 Cl1  | 355.02262 |
| MAL | C15 H14 O10 Cl2 | 422.98913 |
| MAL | C15 H14 O7 Cl2  | 375.00439 |
| MAL | C15 H14 O8 Cl2  | 390.9993  |
| MAL | C15 H15 O6 Cl1  | 325.04844 |
| MAL | C15 H15 O7 Cl1  | 341.04336 |
| MAL | C15 H16 O10 Cl2 | 425.00478 |
| MAL | C15 H16 O7 Cl2  | 377.02004 |

|     |                 |           |
|-----|-----------------|-----------|
| MAL | C15 H17 O5 CI1  | 311.06918 |
| MAL | C15 H17 O7 CI1  | 343.05901 |
| MAL | C15 H17 O9 CI1  | 375.04884 |
| MAL | C15 H18 O7 CI2  | 379.03569 |
| MAL | C15 H18 O8 CI2  | 395.0306  |
| MAL | C16 H12 O10 CI2 | 432.97348 |
| MAL | C16 H12 O9 CI2  | 416.97857 |
| MAL | C16 H14 O10 CI2 | 434.98913 |
| MAL | C16 H14 O9 CI2  | 418.99422 |
| MAL | C16 H15 O7 CI1  | 353.04336 |
| MAL | C16 H16 O7 CI2  | 389.02004 |
| MAL | C16 H16 O8 CI2  | 405.01495 |
| MAL | C16 H16 O9 CI2  | 421.00987 |
| MAL | C16 H17 O10 CI1 | 403.04375 |
| MAL | C16 H18 O8 CI2  | 407.0306  |
| MAL | C16 H18 O9 CI2  | 423.02552 |
| MAL | C16 H19 O6 CI1  | 341.07974 |
| MAL | C16 H19 O8 CI1  | 373.06957 |
| MAL | C16 H19 O9 CI1  | 389.06449 |
| MAL | C16 H21 O6 CI1  | 343.09539 |
| MAL | C17 H15 O10 CI1 | 413.0281  |
| MAL | C17 H15 O8 CI1  | 381.03827 |
| MAL | C17 H16 O10 CI2 | 449.00478 |
| MAL | C17 H16 O11 CI2 | 464.9997  |
| MAL | C17 H16 O9 CI2  | 433.00987 |
| MAL | C17 H17 O6 CI1  | 351.06409 |
| MAL | C17 H17 O7 CI1  | 367.05901 |
| MAL | C17 H18 O7 CI2  | 403.03569 |
| MAL | C17 H18 O8 CI2  | 419.0306  |
| MAL | C17 H18 O9 CI2  | 435.02552 |
| MAL | C17 H19 O10 CI1 | 417.0594  |
| MAL | C17 H19 O8 CI1  | 385.06957 |
| MAL | C17 H20 O8 CI2  | 421.04625 |
| MAL | C17 H21 O6 CI1  | 355.09539 |
| MAL | C17 H21 O7 CI1  | 371.09031 |
| MAL | C17 H21 O8 CI1  | 387.08522 |
| MAL | C17 H23 O7 CI1  | 373.10596 |
| MAL | C18 H13 O10 CI1 | 423.01245 |
| MAL | C18 H17 O10 CI1 | 427.04375 |
| MAL | C18 H17 O8 CI1  | 395.05392 |
| MAL | C18 H18 O9 CI2  | 447.02552 |
| MAL | C18 H19 O10 CI1 | 429.0594  |
| MAL | C18 H20 O10 CI2 | 465.03608 |
| MAL | C18 H20 O9 CI2  | 449.04117 |
| MAL | C18 H21 O10 CI1 | 431.07505 |
| MAL | C18 H23 O7 CI1  | 385.10596 |
| MAL | C18 H23 O8 CI1  | 401.10087 |
| MAL | C19 H19 O9 CI1  | 425.06449 |



|     |                       |           |
|-----|-----------------------|-----------|
| MAL | C19 H21 O9 Cl1        | 427.08014 |
| MAL | C19 H22 O9 Cl2        | 463.05682 |
| MAL | C19 H23 O8 Cl1        | 413.10087 |
| MAL | C19 H23 O9 Cl1        | 429.09579 |
| MAL | C19 H25 O8 Cl1        | 415.11652 |
| MAL | C20 H19 O10 Cl1       | 453.0594  |
| MAL | C20 H21 O9 Cl1        | 439.08014 |
| MAL | C20 H25 O9 Cl1        | 443.11144 |
| MAL | C22 H41 O10 N1 S1 Cl2 | 580.17555 |
| MAL | C24 H30 O1 N1 Cl2 Br1 | 496.08151 |
| MAL | C27 H34 O1 N1 Cl2 Br1 | 536.11281 |
| MAL | C28 H49 O9 S1 Cl3     | 665.20901 |

**Table S10.** List of verified DBP molecular compositions detected after chemical disinfection only, i.e., DBPs detected in after chemical disinfection but not in tap waters, from the four DWTPs, LIN, NOR, STO and MAL, including data for all five sampling occasions. Note that each DBP formula is reported once for each DWTP, even though they were detected at multiple sampling occasions.

| <b>DWTP</b> | <b>DBP Formula<br/>Neutral form</b> | <b>Theoretical Mass<br/>Negative Ion</b> |
|-------------|-------------------------------------|------------------------------------------|
| LIN         | C12 H10 O8 Cl2                      | 350.968                                  |
| LIN         | C13 H11 O9 Cl1                      | 345.00189                                |
| LIN         | C13 H12 O8 Cl2                      | 364.98365                                |
| LIN         | C13 H14 O9 Cl2                      | 382.99422                                |
| LIN         | C13 H17 O7 Cl1                      | 319.05901                                |
| LIN         | C14 H10 O9 Cl2                      | 390.96292                                |
| LIN         | C14 H11 O9 Cl1                      | 357.00189                                |
| LIN         | C14 H13 O6 Cl1                      | 311.03279                                |
| LIN         | C14 H15 O10 Cl1                     | 377.0281                                 |
| LIN         | C14 H15 O6 Cl1                      | 313.04844                                |
| LIN         | C14 H16 O8 Cl2                      | 381.01495                                |
| LIN         | C14 H19 O6 Cl1                      | 317.07974                                |
| LIN         | C14 H19 O7 Cl1                      | 333.07466                                |
| LIN         | C14 H21 O7 Cl1                      | 335.09031                                |
| LIN         | C15 H11 O7 Cl1                      | 337.01206                                |
| LIN         | C15 H12 O10 Cl2                     | 420.97348                                |
| LIN         | C15 H14 O10 Cl2                     | 422.98913                                |
| LIN         | C15 H14 O11 Cl2                     | 438.98405                                |
| LIN         | C15 H14 O7 Cl2                      | 375.00439                                |
| LIN         | C15 H14 O8 Cl2                      | 390.9993                                 |
| LIN         | C15 H17 O6 Cl1                      | 327.06409                                |
| LIN         | C15 H17 O9 Cl1                      | 375.04884                                |
| LIN         | C15 H18 O7 Cl2                      | 379.03569                                |
| LIN         | C15 H18 O8 Cl2                      | 395.0306                                 |
| LIN         | C15 H18 O9 Cl2                      | 411.02552                                |
| LIN         | C15 H21 O6 Cl1                      | 331.09539                                |
| LIN         | C15 H21 O7 Cl1                      | 347.09031                                |
| LIN         | C16 H11 O9 Cl1                      | 381.00189                                |
| LIN         | C16 H13 O8 Cl1                      | 367.02262                                |
| LIN         | C16 H14 O10 Cl2                     | 434.98913                                |
| LIN         | C16 H14 O8 Cl2                      | 402.9993                                 |
| LIN         | C16 H16 O10 Cl2                     | 437.00478                                |
| LIN         | C16 H16 O11 Cl2                     | 452.9997                                 |
| LIN         | C16 H16 O8 Cl2                      | 405.01495                                |
| LIN         | C16 H17 O11 Cl1                     | 419.03867                                |
| LIN         | C16 H18 O8 Cl2                      | 407.0306                                 |
| LIN         | C16 H18 O9 Cl2                      | 423.02552                                |
| LIN         | C16 H19 O10 Cl1                     | 405.0594                                 |
| LIN         | C16 H19 O6 Cl1                      | 341.07974                                |
| LIN         | C16 H21 O6 Cl1                      | 343.09539                                |

|     |                     |           |
|-----|---------------------|-----------|
| LIN | C16 H23 O7 Cl1      | 361.10596 |
| LIN | C17 H13 O11 Cl1     | 427.00737 |
| LIN | C17 H14 O11 Cl2     | 462.98405 |
| LIN | C17 H15 O11 Cl1     | 429.02302 |
| LIN | C17 H15 O9 Cl1      | 397.03319 |
| LIN | C17 H16 O10 Cl2     | 449.00478 |
| LIN | C17 H17 O11 Cl1     | 431.03867 |
| LIN | C17 H17 O8 Cl1      | 383.05392 |
| LIN | C17 H18 O9 Cl2      | 435.02552 |
| LIN | C17 H19 O10 Cl1     | 417.0594  |
| LIN | C17 H21 O6 Cl1      | 355.09539 |
| LIN | C17 H21 O7 Cl1      | 371.09031 |
| LIN | C17 H23 O7 Cl1      | 373.10596 |
| LIN | C18 H13 O10 Cl1     | 423.01245 |
| LIN | C18 H15 O1 S1 Cl1   | 313.04594 |
| LIN | C18 H17 O11 Cl1     | 443.03867 |
| LIN | C18 H19 O11 Cl1     | 445.05432 |
| LIN | C18 H21 O7 Cl1      | 383.09031 |
| LIN | C18 H21 O8 Cl1      | 399.08522 |
| LIN | C18 H23 O9 Cl1      | 417.09579 |
| LIN | C18 H25 O8 Cl1      | 403.11652 |
| LIN | C18 H27 O6 Cl1      | 373.14234 |
| LIN | C19 H19 O11 Cl1     | 457.05432 |
| LIN | C19 H21 O10 Cl1     | 443.07505 |
| LIN | C19 H21 O9 Cl1      | 427.08014 |
| LIN | C19 H23 O10 Cl1     | 445.0907  |
| LIN | C19 H23 O11 Cl1     | 461.08562 |
| LIN | C19 H23 O9 Cl1      | 429.09579 |
| LIN | C19 H25 O10 Cl1     | 447.10635 |
| LIN | C19 H27 O8 Cl1      | 417.13217 |
| LIN | C19 H27 O9 Cl1      | 433.12709 |
| LIN | C20 H25 O10 Cl1     | 459.10635 |
| LIN | C20 H27 O8 Cl1      | 429.13217 |
| LIN | C20 H29 O7 Cl1      | 415.15291 |
| LIN | C20 H29 O8 Cl1      | 431.14782 |
| LIN | C21 H29 O10 Cl1     | 475.13765 |
| LIN | C21 H31 O8 Cl1      | 445.16347 |
| LIN | C26 H29 O1 Br1      | 435.1329  |
| LIN | C29 H27 O4 Br1      | 517.102   |
| LIN | C5 H1 O3 Cl1 Br2    | 300.79082 |
| LIN | C5 H3 O1 S1 Cl1 Br2 | 302.78871 |
| LIN | C5 H3 O1 S1 Cl2 Br1 | 258.83923 |
| NOR | C11 H10 O7 Cl2      | 322.97309 |
| NOR | C11 H13 O6 S1 Br1   | 350.95435 |
| NOR | C12 H11 O6 Cl1      | 285.01714 |
| NOR | C12 H11 O8 Cl1      | 317.00697 |
| NOR | C12 H12 O9 Cl2      | 368.97857 |
| NOR | C12 H15 O7 Cl1      | 305.04336 |

|     |                       |           |
|-----|-----------------------|-----------|
| NOR | C12 H9 O7 Cl1         | 298.99641 |
| NOR | C13 H10 O8 Cl2        | 362.968   |
| NOR | C13 H10 O9 Cl2        | 378.96292 |
| NOR | C13 H11 O9 Cl1        | 345.00189 |
| NOR | C13 H15 O5 Cl1        | 285.05353 |
| NOR | C13 H15 O8 Cl1        | 333.03827 |
| NOR | C13 H9 O7 Cl1         | 310.99641 |
| NOR | C14 H11 O8 Cl1        | 341.00697 |
| NOR | C14 H12 O10 Cl2       | 408.97348 |
| NOR | C14 H14 O7 Cl2        | 363.00439 |
| NOR | C14 H15 O5 Cl1        | 297.05353 |
| NOR | C14 H9 O7 Cl1         | 322.99641 |
| NOR | C15 H12 O7 Cl2        | 372.98874 |
| NOR | C15 H14 O10 Cl2       | 422.98913 |
| NOR | C15 H14 O7 Cl2        | 375.00439 |
| NOR | C15 H15 O6 Cl1        | 325.04844 |
| NOR | C15 H17 O10 Cl1       | 391.04375 |
| NOR | C15 H28 O3 Cl1 Br1    | 369.08376 |
| NOR | C16 H13 O7 Cl1        | 351.02771 |
| NOR | C16 H14 O10 Cl2       | 434.98913 |
| NOR | C16 H16 O9 Cl2        | 421.00987 |
| NOR | C16 H17 O7 Br1        | 399.00849 |
| NOR | C16 H19 O10 Cl1       | 405.0594  |
| NOR | C16 H19 O7 Br1        | 401.02414 |
| NOR | C16 H23 O6 Cl1        | 345.11104 |
| NOR | C17 H13 O11 Cl1       | 427.00737 |
| NOR | C17 H14 O11 Cl2       | 462.98405 |
| NOR | C17 H14 O9 Cl2        | 430.99422 |
| NOR | C17 H16 O8 Cl2        | 417.01495 |
| NOR | C17 H17 O11 Cl1       | 431.03867 |
| NOR | C17 H18 O10 Cl2       | 451.02043 |
| NOR | C17 H18 O8 Cl2        | 419.0306  |
| NOR | C17 H21 O8 Br1        | 431.03471 |
| NOR | C17 H23 O6 Cl1        | 357.11104 |
| NOR | C17 H34 O2 Cl1 Br1    | 383.1358  |
| NOR | C18 H17 O11 Cl1       | 443.03867 |
| NOR | C18 H19 O7 Cl1        | 381.07466 |
| NOR | C18 H23 O8 Br1        | 445.05036 |
| NOR | C18 H23 O8 Cl1        | 401.10087 |
| NOR | C18 H25 O7 Cl1        | 387.12161 |
| NOR | C18 H25 O8 Cl1        | 403.11652 |
| NOR | C19 H13 O10 Cl1       | 435.01245 |
| NOR | C19 H17 O10 Cl1       | 439.04375 |
| NOR | C20 H19 O11 Cl1       | 469.05432 |
| NOR | C20 H29 O7 Cl1        | 415.15291 |
| NOR | C22 H33 O1 Cl1 Br2    | 505.05139 |
| NOR | C26 H36 O1 N1 Cl2 Br1 | 526.12846 |
| NOR | C5 H3 O1 S1 Cl1 Br2   | 302.78871 |

|     |                    |           |
|-----|--------------------|-----------|
| STO | C12 H10 O8 Cl2     | 350.968   |
| STO | C12 H11 O6 Br1     | 328.96663 |
| STO | C12 H12 O8 Cl2     | 352.98365 |
| STO | C12 H12 O9 Cl2     | 368.97857 |
| STO | C13 H11 O6 Cl1     | 297.01714 |
| STO | C13 H11 O7 Br1     | 356.96154 |
| STO | C13 H12 O9 Cl2     | 380.97857 |
| STO | C13 H13 O6 Cl1     | 299.03279 |
| STO | C13 H13 O7 Br1     | 358.97719 |
| STO | C13 H13 O7 Cl1     | 315.02771 |
| STO | C13 H14 O7 Cl2     | 351.00439 |
| STO | C13 H15 O6 Cl1     | 301.04844 |
| STO | C13 H15 O8 Cl1     | 333.03827 |
| STO | C13 H16 O7 Cl2     | 353.02004 |
| STO | C13 H9 O8 Cl1      | 326.99132 |
| STO | C14 H10 O8 Cl2     | 374.968   |
| STO | C14 H11 O9 Cl1     | 357.00189 |
| STO | C14 H12 O8 Cl2     | 376.98365 |
| STO | C14 H12 O9 Cl2     | 392.97857 |
| STO | C14 H13 O7 Br1     | 370.97719 |
| STO | C14 H13 O9 Cl1     | 359.01754 |
| STO | C14 H14 O10 Cl2    | 410.98913 |
| STO | C14 H14 O8 Cl2     | 378.9993  |
| STO | C14 H14 O9 Cl2     | 394.99422 |
| STO | C14 H15 O10 Cl1    | 377.0281  |
| STO | C14 H15 O5 Cl1     | 297.05353 |
| STO | C14 H15 O6 Br1     | 356.99793 |
| STO | C14 H15 O7 Br1     | 372.99284 |
| STO | C14 H17 O8 Cl1     | 347.05392 |
| STO | C15 H11 O9 Cl1     | 369.00189 |
| STO | C15 H12 O10 Cl2    | 420.97348 |
| STO | C15 H12 O9 Cl2     | 404.97857 |
| STO | C15 H13 O8 Br1     | 398.97211 |
| STO | C15 H13 O9 Cl1     | 371.01754 |
| STO | C15 H14 O8 Cl2     | 390.9993  |
| STO | C15 H14 O9 Cl2     | 406.99422 |
| STO | C15 H15 O6 Br1     | 368.99793 |
| STO | C15 H15 O6 Cl1     | 325.04844 |
| STO | C15 H15 O7 Br1     | 384.99284 |
| STO | C15 H15 O8 Br1     | 400.98776 |
| STO | C15 H16 O8 Cl2     | 393.01495 |
| STO | C15 H17 O6 Br1     | 371.01358 |
| STO | C15 H30 O3 Cl1 Br1 | 371.09941 |
| STO | C16 H11 O9 Cl1     | 381.00189 |
| STO | C16 H13 O8 Cl1     | 367.02262 |
| STO | C16 H14 O10 Cl2    | 434.98913 |
| STO | C16 H17 O10 Cl1    | 403.04375 |
| STO | C16 H17 O6 Cl1     | 339.06409 |

|     |                       |           |
|-----|-----------------------|-----------|
| STO | C16 H17 O7 Br1        | 399.00849 |
| STO | C16 H17 O8 Br1        | 415.00341 |
| STO | C16 H19 O8 Br1        | 417.01906 |
| STO | C17 H15 O9 Cl1        | 397.03319 |
| STO | C17 H19 O9 Br1        | 445.01397 |
| STO | C17 H21 O7 Br1        | 415.03979 |
| STO | C17 H21 O9 Cl1        | 403.08014 |
| STO | C17 H34 O1 S1 Cl1 Br1 | 399.11295 |
| STO | C18 H17 O11 Cl1       | 443.03867 |
| STO | C18 H17 O8 Cl1        | 395.05392 |
| STO | C18 H19 O9 Br1        | 457.01397 |
| STO | C18 H21 O10 Cl1       | 431.07505 |
| STO | C18 H21 O6 Cl1        | 367.09539 |
| STO | C18 H21 O7 Br1        | 427.03979 |
| STO | C18 H23 O7 Br1        | 429.05544 |
| STO | C18 H23 O8 Br1        | 445.05036 |
| STO | C18 H25 O8 Cl1        | 403.11652 |
| STO | C19 H21 O8 Cl1        | 411.08522 |
| STO | C19 H23 O10 Cl1       | 445.0907  |
| STO | C19 H23 O9 Cl1        | 429.09579 |
| STO | C19 H25 O8 Cl1        | 415.11652 |
| STO | C20 H19 O11 Cl1       | 469.05432 |
| STO | C20 H23 O9 Cl1        | 441.09579 |
| STO | C25 H32 O1 N1 Cl2 Br1 | 510.09716 |
| STO | C28 H40 O1 N1 Cl2 Br1 | 554.15976 |
| STO | C29 H40 O1 N1 Cl2 Br1 | 566.15976 |
| STO | C29 H42 O1 N1 Cl2 Br1 | 568.17541 |
| STO | C30 H46 O1 N1 Cl2 Br1 | 584.20671 |
| STO | C30 H47 O9 S1 Cl3     | 687.19336 |
| STO | C5 H1 O3 Cl1 Br2      | 300.79082 |
| STO | C5 H3 O1 S1 Br3       | 346.7382  |
| MAL | C13 H11 O7 Br1        | 356.96154 |
| MAL | C13 H11 O7 Br1        | 356.96154 |
| MAL | C13 H13 O7 Br1        | 358.97719 |
| MAL | C13 H13 O8 Br1        | 374.97211 |
| MAL | C13 H15 O6 Br1        | 344.99793 |
| MAL | C14 H11 O7 Br1        | 368.96154 |
| MAL | C14 H11 O8 Br1        | 384.95646 |
| MAL | C14 H13 O6 Br1        | 354.98228 |
| MAL | C14 H13 O7 Br1        | 370.97719 |
| MAL | C14 H13 O8 Br1        | 386.97211 |
| MAL | C14 H13 O9 Br1        | 402.96702 |
| MAL | C14 H15 O6 Br1        | 356.99793 |
| MAL | C14 H15 O7 Br1        | 372.99284 |
| MAL | C14 H15 O8 Br1        | 388.98776 |
| MAL | C14 H17 O6 Br1        | 359.01358 |
| MAL | C14 H17 O7 Br1        | 375.00849 |
| MAL | C15 H11 O8 Br1        | 396.95646 |

|     |                       |           |
|-----|-----------------------|-----------|
| MAL | C15 H13 O10 Br1       | 430.96194 |
| MAL | C15 H13 O6 Br1        | 366.98228 |
| MAL | C15 H13 O7 Br1        | 382.97719 |
| MAL | C15 H13 O8 Br1        | 398.97211 |
| MAL | C15 H13 O9 Br1        | 414.96702 |
| MAL | C15 H15 O5 Br1        | 353.00301 |
| MAL | C15 H15 O6 Br1        | 368.99793 |
| MAL | C15 H15 O7 Br1        | 384.99284 |
| MAL | C15 H15 O8 Br1        | 400.98776 |
| MAL | C15 H15 O9 Br1        | 416.98267 |
| MAL | C15 H17 O5 Br1        | 355.01866 |
| MAL | C15 H17 O6 Br1        | 371.01358 |
| MAL | C15 H17 O7 Br1        | 387.00849 |
| MAL | C15 H17 O8 Br1        | 403.00341 |
| MAL | C15 H17 O8 S1 Br1     | 434.97548 |
| MAL | C15 H19 O6 Br1        | 373.02923 |
| MAL | C15 H31 O10 N1 S1 Cl2 | 486.0973  |
| MAL | C16 H11 O9 Br1        | 424.95137 |
| MAL | C16 H13 O7 Br1        | 394.97719 |
| MAL | C16 H13 O8 Br1        | 410.97211 |
| MAL | C16 H13 O9 Br1        | 426.96702 |
| MAL | C16 H15 O10 Br1       | 444.97759 |
| MAL | C16 H15 O6 Br1        | 380.99793 |
| MAL | C16 H15 O7 Br1        | 396.99284 |
| MAL | C16 H15 O8 Br1        | 412.98776 |
| MAL | C16 H15 O9 Br1        | 428.98267 |
| MAL | C16 H15 O9 Cl1        | 385.03319 |
| MAL | C16 H17 O6 Br1        | 383.01358 |
| MAL | C16 H17 O7 Br1        | 399.00849 |
| MAL | C16 H17 O8 Br1        | 415.00341 |
| MAL | C16 H17 O9 Br1        | 430.99832 |
| MAL | C16 H17 O9 Cl1        | 387.04884 |
| MAL | C16 H19 O6 Br1        | 385.02923 |
| MAL | C16 H19 O7 Br1        | 401.02414 |
| MAL | C16 H19 O8 Br1        | 417.01906 |
| MAL | C16 H19 O9 Br1        | 433.01397 |
| MAL | C16 H21 O6 Br1        | 387.04488 |
| MAL | C16 H21 O7 Br1        | 403.03979 |
| MAL | C17 H13 O10 Br1       | 454.96194 |
| MAL | C17 H13 O7 Br1        | 406.97719 |
| MAL | C17 H13 O8 Br1        | 422.97211 |
| MAL | C17 H13 O9 Br1        | 438.96702 |
| MAL | C17 H15 O10 Br1       | 456.97759 |
| MAL | C17 H15 O7 Br1        | 408.99284 |
| MAL | C17 H15 O8 Br1        | 424.98776 |
| MAL | C17 H15 O9 Br1        | 440.98267 |
| MAL | C17 H15 O9 Cl1        | 397.03319 |
| MAL | C17 H17 O10 Br1       | 458.99324 |

|     |                 |           |
|-----|-----------------|-----------|
| MAL | C17 H17 O6 Br1  | 395.01358 |
| MAL | C17 H17 O7 Br1  | 411.00849 |
| MAL | C17 H17 O8 Br1  | 427.00341 |
| MAL | C17 H17 O9 Br1  | 442.99832 |
| MAL | C17 H19 O10 Br1 | 461.00889 |
| MAL | C17 H19 O7 Br1  | 413.02414 |
| MAL | C17 H19 O8 Br1  | 429.01906 |
| MAL | C17 H19 O9 Br1  | 445.01397 |
| MAL | C17 H21 O6 Br1  | 399.04488 |
| MAL | C17 H21 O7 Br1  | 415.03979 |
| MAL | C17 H21 O8 Br1  | 431.03471 |
| MAL | C17 H21 O9 Br1  | 447.02962 |
| MAL | C18 H13 O8 Br1  | 434.97211 |
| MAL | C18 H13 O9 Br1  | 450.96702 |
| MAL | C18 H15 O10 Br1 | 468.97759 |
| MAL | C18 H15 O7 Br1  | 420.99284 |
| MAL | C18 H15 O8 Br1  | 436.98776 |
| MAL | C18 H15 O9 Br1  | 452.98267 |
| MAL | C18 H17 O10 Br1 | 470.99324 |
| MAL | C18 H17 O11 Br1 | 486.98815 |
| MAL | C18 H17 O8 Br1  | 439.00341 |
| MAL | C18 H17 O9 Br1  | 454.99832 |
| MAL | C18 H19 O10 Br1 | 473.00889 |
| MAL | C18 H19 O7 Br1  | 425.02414 |
| MAL | C18 H19 O8 Br1  | 441.01906 |
| MAL | C18 H19 O9 Br1  | 457.01397 |
| MAL | C18 H21 O6 Br1  | 411.04488 |
| MAL | C18 H21 O7 Br1  | 427.03979 |
| MAL | C18 H21 O8 Br1  | 443.03471 |
| MAL | C18 H21 O9 Br1  | 459.02962 |
| MAL | C18 H23 O7 Br1  | 429.05544 |
| MAL | C18 H23 O8 Br1  | 445.05036 |
| MAL | C18 H23 O9 Br1  | 461.04527 |
| MAL | C19 H15 O10 Br1 | 480.97759 |
| MAL | C19 H15 O9 Br1  | 464.98267 |
| MAL | C19 H17 O10 Br1 | 482.99324 |
| MAL | C19 H17 O7 Br1  | 435.00849 |
| MAL | C19 H17 O8 Br1  | 451.00341 |
| MAL | C19 H17 O9 Br1  | 466.99832 |
| MAL | C19 H19 O10 Br1 | 485.00889 |
| MAL | C19 H19 O8 Br1  | 453.01906 |
| MAL | C19 H21 O10 Br1 | 487.02454 |
| MAL | C19 H21 O7 Br1  | 439.03979 |
| MAL | C19 H21 O8 Br1  | 455.03471 |
| MAL | C19 H21 O9 Br1  | 471.02962 |
| MAL | C19 H23 O6 Br1  | 425.06053 |
| MAL | C19 H23 O7 Br1  | 441.05544 |
| MAL | C19 H23 O8 Br1  | 457.05036 |



|     |                       |           |
|-----|-----------------------|-----------|
| MAL | C19 H23 O9 Br1        | 473.04527 |
| MAL | C19 H25 O7 Br1        | 443.07109 |
| MAL | C20 H19 O9 Br1        | 481.01397 |
| MAL | C20 H21 O10 Br1       | 499.02454 |
| MAL | C20 H21 O8 Br1        | 467.03471 |
| MAL | C20 H21 O9 Br1        | 483.02962 |
| MAL | C20 H23 O9 Br1        | 485.04527 |
| MAL | C21 H21 O11 Br1       | 527.01945 |
| MAL | C21 H23 O9 Br1        | 497.04527 |
| MAL | C23 H32 O1 N1 Cl2 Br1 | 486.09716 |
| MAL | C25 H36 O1 N1 Cl2 Br1 | 514.12846 |
| MAL | C26 H32 O1 N1 Cl2 Br1 | 522.09716 |
| MAL | C27 H23 O5 Cl1        | 461.11613 |
| MAL | C30 H40 O3 N1 Cl2 Br1 | 610.14959 |
| MAL | C5 H1 O3 Br3          | 344.74031 |
| MAL | C5 H1 O3 Cl1 Br2      | 300.79082 |
| MAL | C5 H3 O1 S1 Br3       | 346.7382  |
| MAL | C5 H3 O1 S1 Cl1 Br2   | 302.78871 |
| MAL | C7 H7 O5 Br1          | 248.94041 |
